# Supplementary material for: The long-awaited synthesis and self-assembly of a small rigid C3-symmetric trilactam
Source: Royal Society of Chemistry journal article supplement (doi:10.1039/d2cc00345g), 2022-01-01
Supplement: d2cc00345g1.pdf [file d2cc00345g1.pdf]

## *Supporting Information*

### **The Long-Awaited Synthesis and Self-Assembly of a Small Rigid $C_3$ Symmetric Trilactam**

Yutang Li,<sup>†</sup> Daniel Strand,<sup>†</sup> Stefan Grimme,<sup>‡</sup> Stefán Jónsson,<sup>†</sup> Kenneth Wärnmark<sup>\*,†</sup>

<sup>†</sup> *Centre for Analysis and Synthesis, Department of Chemistry, Lund University, SE-221 00  
Lund, Sweden*

<sup>‡</sup> *Mulliken Center for Theoretical Chemistry, Institut für Physikalische und Theoretische  
Chemie, Rheinische Friedrich-Wilhelms-Universität Bonn, 53115 Bonn, Germany*

## Index

|                                                                                                                                                                                                                                                         |     |
|---------------------------------------------------------------------------------------------------------------------------------------------------------------------------------------------------------------------------------------------------------|-----|
| 1. General procedures .....                                                                                                                                                                                                                             | S3  |
| 2. Experimental procedures and analytical data for <i>rac</i> - <b>12</b> , <i>rac</i> - <b>13</b> , <i>rac</i> - <b>14</b> , <i>rac</i> - <b>15</b> , <i>rac</i> - <b>16</b> ,<br>(-)- <b>16</b> , <i>rac</i> - <b>1</b> and (+)-(SSS)- <b>1</b> ..... | S5  |
| 3. Assignment of the absolute configuration of (+)- <b>1</b> .....                                                                                                                                                                                      | S15 |
| 4. Single crystal X-ray diffraction (scXRD) analysis of <i>rac</i> - <b>13</b> , <i>rac</i> - <b>1</b> -d <sub>3</sub> , and (+)-(SSS)- <b>1</b><br>.....                                                                                               | S18 |
| 5. Modelled self-assembly structures of <b>1</b> .....                                                                                                                                                                                                  | S24 |
| 6. Preliminary self-assembly studies of <i>rac</i> - <b>1</b> and (+)-(SSS)- <b>1</b> in solution.....                                                                                                                                                  | S25 |
| 7. Copies of <sup>1</sup> H and <sup>13</sup> C NMR spectra for <i>rac</i> - <b>12</b> , <i>rac</i> - <b>13</b> , <i>rac</i> - <b>14</b> , <i>rac</i> - <b>15</b> , <i>rac</i> - <b>16</b> , <i>rac</i> - <b>1</b> and<br>(+)-(SSS)- <b>1</b> . ....    | S26 |
| References.....                                                                                                                                                                                                                                         | S33 |

## 1. General procedures

**Reagents and solvents:** Diethyl 2-oxopentanedioate was synthesized and purified following a reported procedure.<sup>[1]</sup> Ethyl 2-oxoacetate was purchased from Alfa Aesar as a technical solution (ca 50 wt. %) in toluene. The exact molar concentration of 2-oxoacetate was determined prior to use by <sup>1</sup>H NMR with dimethyl sulfone as the internal standard. *tert*-Butoxy bis(dimethyl-amino)methane (Bredereck's reagent) was purchased from Acros Organics. Hydrogen gas ( $\geq 99.999\%$ ) was purchased from Linde. All the other reagents were purchased from Sigma-Aldrich and used without further purification. Anhydrous MeOH was purchased from Sigma-Aldrich and used as bought. All the other solvents were bought and used as reagent grade.

**Reaction details:** Unless otherwise stated, all reactions were conducted under nitrogen. Reactions run in room temperature were in the range of 20-23 °C. Heating plates with temperature control and metal heating blocks were used when the reaction temperature was higher than room temperature. For the reactions run at 0 °C, an ice bath was used when the reaction time was shorter than 6 h, and a Julabo FT902 Immersion Cooler was used with EtOH as the cooling media when the reaction time was longer than 6 h. The pressurized hydrogenation reactions were conducted in a Straus flask equipped with a magnetic stir bar. The pressure in the hydrogenation reactions was generated by filling in hydrogen at -196 °C and warming the sealed flask slowly to room temperature. All the other reaction were conducted in a round bottom flask equipped with a magnetic stir bar.

**Chromatography:** Analytical thin-layer chromatography (TLC) was carried out on Merck TLC Silica Gel 60 F<sub>254</sub> and visualized with a UV-lamp (254 nm) or potassium permanganate stain. Silica gel column chromatography was performed with silica gel from Sigma-Aldrich (60 Å, 230-400 mesh) and reagent-grade solvents. Ion-exchange column chromatography was performed with ion-exchange resin (DOWEX<sup>®</sup> 50WX4-200) and deionized water ( $\varnothing = 3$  cm, h = 6 cm). Preparative reverse phase HPLC for the purification of *rac*-**1** and (+)-(*SSS*)-**1** was performed using an Agilent Infinity 1260 HPLC with Waters XSelect<sup>®</sup> CSH<sup>™</sup> Prep C18 column (5  $\mu$ m, OBD<sup>™</sup>, 19x250 mm). Preparative chiral separation of *rac*-**16** and all the analytical chiral HPLC were performed by CHIRAL TECHNOLOGIES EUROPE, France.

**NMR spectroscopy:** <sup>1</sup>H NMR and <sup>13</sup>C NMR spectra were recorded on a Bruker Avance II at 400.1 MHz and 100.6 MHz, respectively. The spectra were recorded in CDCl<sub>3</sub> and referenced to residual CDCl<sub>3</sub> ( $\delta$  7.26 <sup>1</sup>H; 77.16 <sup>13</sup>C) or DMSO-*d*<sub>6</sub> and referenced to residual DMSO-*d*<sub>6</sub> (2.50 <sup>1</sup>H; 39.52 <sup>13</sup>C). Chemical shifts ( $\delta$ ) are expressed in parts per million (ppm) and coupling

constants ( $J$ ) are reported in Hertz (Hz). The following abbreviations are used to indicate apparent multiplicities: s, singlet; d, doublet; dd, doublet of doublets; ddd, doublet of doublet of doublets; t, triplet; m, multiplet.

**Melting points:** Melting points were measured using a Stuart SMP3 Melting Point Apparatus.

**IR spectroscopy:** IR transmittance spectra were recorded on a Bruker ALPHA FT-IR Spectrometer and reported in  $\text{cm}^{-1}$ . The following abbreviations were used to indicate the peak shape or peak intensity: br, broad; s, strong; m, moderate; w, weak.

**Mass spectroscopy:** High resolution mass spectroscopy (HRMS) was carried out using a Waters Xevo-G2 QTof Spectrometer using electron spray (ESI) ionization and was run in positive mode.

**Elemental analysis:** Elemental analyses were performed by A. Kolbe, Mikroanalytisches Laboratorium, Germany.

**Specific rotation:** Specific rotations  $[\alpha]_D^T$  were measured using Bellingham + Stanley Single Wavelength Polarimeter ADP450 at 25 °C. D represents the sodium D line (589 nm). Concentrations were reported in g/mL.

**Circular dichroism:** Circular dichroism spectra were recorded on a Jasco J-815 Circular Dichroism Spectropolarimeter under the following conditions: bandwidth, 1 nm; scan rate, 100  $\text{nm}\cdot\text{min}^{-1}$ ; accumulation, 3 times; data interval, 1 nm; cell length, 2 mm; temperature, 20 °C

2. *Experimental procedures and analytical data for rac-12, rac-13, rac-14, rac-15, rac-16, (-)-16, rac-1 and (+)-(SSS)-1*

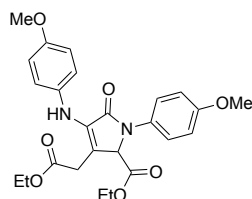

***rac*-Ethyl 3-(2-ethoxy-2-oxoethyl)-1-(4-methoxyphenyl)-4-((4-methoxyphenyl)amino)-5-oxo-2,5-dihydro-1*H*-pyrrole-2-carboxylate (*rac*-12)**

To a slurry of  $\text{MgSO}_4$  (50.0 g) and 4-anisidine (7.39 g, 60.0 mmol) in AcOH (400 mL) was added ethyl 2-oxoacetate (5.61 M in toluene, 5.30 mL, 30.0 mmol) and diethyl 2-oxopentanedioate (18.2 g, 16.4 mL, 90.0 mmol). The resulted yellow slurry was stirred for 6 h at room temperature. The reaction mixture was filtered, and the solid residue was washed with EtOAc. The combined filtrate was concentrated under reduced pressure, giving a viscous reddish oil. The crude was subjected to a silica column ( $\phi = 8$  cm,  $h = 10$  cm, *n*-heptane/EtOAc, 2 : 1, v/v), resulting in *rac*-12 as a viscous yellow oil (10.7 g, 76%) which turned to sticky yellow solid over time under vacuum. Further recrystallization with EtOH afforded *rac*-12 as a yellow solid.  $^1\text{H}$  NMR (400 MHz,  $\text{CDCl}_3$ )  $\delta$  7.52 – 7.44 (m, 2H), 7.06 – 6.97 (m, 2H), 6.95 – 6.87 (m, 2H), 6.86 – 6.78 (m, 2H), 6.02 (s, 1H), 5.23 (s, 1H), 4.20 – 4.01 (m, 4H), 3.80 (s, 3H), 3.79 (s, 3H), 3.18 (d,  $J = 17.9$  Hz, 1H), 2.99 (dd,  $J = 17.9, 1.1$  Hz, 1H), 1.21 (t,  $J = 7.2$  Hz, 3H), 1.13 (t,  $J = 7.1$  Hz, 3H) ppm.

$^{13}\text{C}$  NMR (101 MHz,  $\text{CDCl}_3$ )  $\delta$  169.97, 168.70, 166.95, 157.28, 156.68, 134.67, 133.31, 130.86, 124.61, 122.83, 114.48, 114.43, 106.27, 64.98, 62.00, 61.13, 55.60, 55.57, 31.60, 14.26, 14.12 ppm.

HRMS (ESI+)  $m/z$ :  $[\text{M}+\text{H}]^+$  Calcd for  $\text{C}_{25}\text{H}_{29}\text{N}_2\text{O}_7$  469.1975; Found 469.1973.

Elemental analysis Calcd (%) for  $\text{C}_{25}\text{H}_{28}\text{N}_2\text{O}_7$ : C 64.09, H 6.02, N 5.98; Found: C 63.84, H 6.01, N 5.95.

IR (neat)  $\nu_{\text{max}}$  3319 (br), 1734 (m), 1696 (m), 1513 (s), 1246 (m), 1182 (m), 1030 (m)  $\text{cm}^{-1}$ .

Melting point: 113-114  $^\circ\text{C}$ .

$R_f = 0.2$  (*n*-heptane/EtOAc, 2 : 1, v/v).

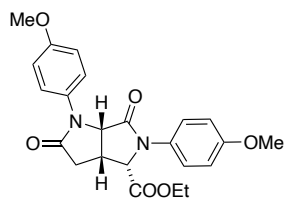

***rac*-Ethyl (3a*R*\*,4*S*\*,6a*S*\*)-1,5-bis(4-methoxyphenyl)-2,6-dioxooctahydropyrrolo[3,4-*b*]pyrrole-4-carboxylate (*rac*-13)**

To a slurry of *rac*-12 (2.00 g, 4.26 mmol) in anhydrous MeOH (60.0 mL) was carefully added palladium on activated charcoal (10 wt. %, 454 mg, 0.426 mmol). The mixture was stirred at room temperature under H<sub>2</sub> (~4 atm) for three days. After that time the reaction vessel was carefully opened to air. The reaction mixture was filtered through a pad of celite. The celite was washed with CHCl<sub>3</sub> (2 x 30 mL). The combined filtrate was concentrated under reduced pressure, resulting in a viscous yellow oil or a sticky yellow solid in quantitative yield.

To this product (17.6 g, 37.4 mmol) was added AcOH (200 mL), and the resulting mixture was stirred at 60 °C overnight. The next day, the reaction mixture was concentrated under reduced pressure, giving in yellowish solid. Further recrystallization with EtOH afforded *rac*-13 as a white solid (12.6 g, 79%).

**<sup>1</sup>H NMR** (400 MHz, CDCl<sub>3</sub>) δ 7.60 – 7.46 (m, 2H), 7.31 – 7.26 (m, 2H), 6.98 – 6.81 (m, 4H), 4.92 (dd, *J* = 8.5, 1.3 Hz, 1H), 4.71 (dd, *J* = 8.3, 2.1 Hz, 1H), 4.28 – 4.06 (m, 2H), 3.78 (s, 3H), 3.77 (s, 3H), 3.54 (ddd, *J* = 9.1, 6.7, 2.4 Hz, 1H), 2.78 – 2.60 (m, 2H), 1.19 (t, *J* = 7.1 Hz, 3H) ppm.

**<sup>13</sup>C NMR** (101 MHz, CDCl<sub>3</sub>) δ 171.91, 169.05, 168.92, 158.07, 158.00, 130.19, 130.15, 125.85, 124.33, 114.31, 114.29, 64.02, 62.96, 62.31, 55.50, 55.49, 33.13, 31.55, 14.17 ppm.

**HRMS** (ESI<sup>+</sup>) *m/z*: [M+H]<sup>+</sup> Calcd for C<sub>23</sub>H<sub>25</sub>N<sub>2</sub>O<sub>6</sub> 425.1713; Found 425.1706.

**Elemental analysis** Calcd (%) for C<sub>23</sub>H<sub>24</sub>N<sub>2</sub>O<sub>6</sub>: C 65.08, H 5.70, N 6.60; Found: C 64.74, H 5.76, N 6.55.

**IR** (neat)  $\nu_{\text{max}}$  1739 (m), 1694 (s), 1509 (s), 1379 (m), 1243 (s), 1181 (m), 1027 (s) cm<sup>-1</sup>.

**Melting point:** 179-180 °C.

**R<sub>f</sub>** = 0.4 (EtOAc).

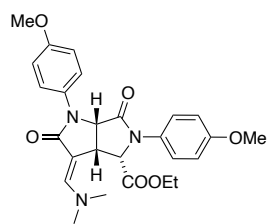

***rac*-Ethyl (3a*R*\*,4*S*\*,6a*S*\*,*E*)-3-((dimethylamino)methylene)-1,5-bis(4-methoxyphenyl)-2,6-dioxooctahydropyrrolo[3,4-*b*]pyrrole-4-carboxylate (*rac*-14)**

To a slurry of *rac*-13 (12.6 g, 29.7 mmol) in toluene (50.0 mL) was added *tert*-butoxy bis(dimethylamino)methane (Bredereck's reagent, 24.5 mL, 119 mmol). The mixture was heated to 110 °C and stirred at this temperature overnight. The next day, TLC indicated that the starting material was consumed. The reaction mixture was concentrated under reduced pressure, giving a white yellow solid as crude. Recrystallization of the crude with boiling EtOAc afforded *rac*-14 (5.14 g) as off-white crystals. The filtrate was concentrated under reduced pressure and subjected to a silica column ( $\phi$  = 4.5 cm, h = 10 cm, EtOAc : MeOH = 15 : 1), giving *rac*-14 as a light-yellow solid (2.17 g, in total 7.31 g, 51%).

**<sup>1</sup>H NMR** (400 MHz, CDCl<sub>3</sub>)  $\delta$  7.42 – 7.36 (m, 2H), 7.33 – 7.27 (m, 2H), 7.10 (d,  $J$  = 1.2 Hz, 1H), 6.90 – 6.85 (m, 2H), 6.83 – 6.76 (m, 2H), 4.74 (d,  $J$  = 9.5 Hz, 1H), 4.61 (d,  $J$  = 8.7 Hz, 1H), 4.37 – 4.24 (m, 1H), 4.09 – 3.98 (m, 2H), 3.74 (s, 3H), 3.71 (s, 3H), 3.01 (s, 6H), 1.14 (t,  $J$  = 7.2 Hz, 3H) ppm.

**<sup>13</sup>C NMR** (101 MHz, CDCl<sub>3</sub>)  $\delta$  170.76, 169.53, 169.41, 157.57, 157.14, 145.20, 131.06, 130.52, 125.86, 124.07, 114.11, 113.80, 91.33, 77.16, 69.20, 61.69, 61.06, 55.33, 55.30, 41.80, 35.02, 13.93 ppm.

**HRMS** (ESI<sup>+</sup>)  $m/z$ : [M+H]<sup>+</sup> Calcd for C<sub>26</sub>H<sub>30</sub>N<sub>3</sub>O<sub>6</sub> 480.2135; Found 480.2134.

**Elemental analysis** Calcd (%) for C<sub>26</sub>H<sub>29</sub>N<sub>3</sub>O<sub>6</sub>: C 65.12, H 6.10, N 8.76; Found: C 64.89, H 6.07, N 8.63.

**IR** (neat)  $\nu_{\max}$  1740 (w), 1682 (m), 1617 (m), 1509 (s), 1357 (m), 1243 (s), 1180 (m), 1029 (m) cm<sup>-1</sup>.

**Melting point:** 200-201 °C.

**R<sub>f</sub>** = 0.2 (EtOAc).

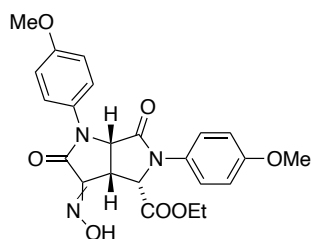

***rac*-Ethyl(3*aR*\*,4*S*\*,6*aS*\*)-3-(hydroxyimino)-1,5-bis(4-methoxyphenyl)-2,6-dioxoocta-hydro-pyrrolo[3,4-*b*]pyrrole-4-carboxylate (*E/Z* isomer) (*rac*-15)**

To a solution of *rac*-14 (5.50 g, 11.5 mmol) in diluted AcOH (200 mL, 10% H<sub>2</sub>O, v/v) at 0 °C was added dropwise an aqueous solution of NaNO<sub>2</sub> (0.5 M, 29.9 mL). The reaction was stirred at 0 °C for three days, during which time the reaction mixture turned from a clear solution to a white slurry. After three days, the reaction mixture was filtered. The solid was washed with ice-cold EtOH (2 x 50 mL) and dried under vacuum, affording *rac*-15 as a white solid (4.75 g, 90%). Compound *rac*-15 was obtained as a mixture of *E/Z* isomers. The ratio between *E*- and *Z*-isomer varied among batches, and the *E*- isomer was found to be the major isomer. The <sup>1</sup>H NMR and <sup>13</sup>C NMR peaks that belongs to the *E*-isomer are reported below.

**<sup>1</sup>H NMR** (400 MHz, DMSO) δ 12.50 (s, 1H), 7.44 (d, *J* = 9.0 Hz, 2H), 7.28 (d, *J* = 9.0 Hz, 2H), 7.00 (d, *J* = 9.1 Hz, 2H), 6.93 (d, *J* = 9.1 Hz, 2H), 5.31 (d, *J* = 9.8 Hz, 1H), 5.05 (d, *J* = 8.5 Hz, 1H), 4.38 (dd, *J* = 9.8, 8.5 Hz, 2H), 3.92 (q, *J* = 7.1 Hz, 2H), 3.79 (s, 3H), 3.73 (s, 3H), 1.06 (t, *J* = 7.1 Hz, 1H) ppm. **<sup>13</sup>C NMR** (101 MHz, DMSO) δ 169.11, 167.93, 161.82, 157.64, 150.23, 130.01, 129.49, 126.14, 125.24, 114.16, 113.83, 63.18, 61.33, 59.56, 55.31, 55.28, 31.85, 13.64 ppm.

**HRMS** (ESI+) *m/z*: [M+H]<sup>+</sup> Calcd for C<sub>24</sub>H<sub>25</sub>N<sub>2</sub>O<sub>7</sub> 453.1662; Found 453.1660.

**Elemental analysis** Calcd (%) for C<sub>24</sub>H<sub>24</sub>N<sub>2</sub>O<sub>7</sub>: C 60.92, H 5.11, N 9.27; Found: C 61.02, H 5.15, N 9.19.

**IR** (neat) ν<sub>max</sub> 3200 (w, br), 1738 (m), 1692 (s), 1516 (s), 1253 (s), 1190 (m), 1029 (m) cm<sup>-1</sup>.

**Melting point:** Decomposes at 216 °C.

**R<sub>f</sub>**: 0.35 (EtOAc).



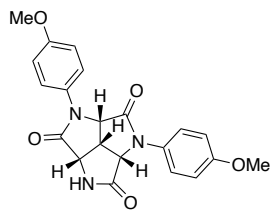

***rac*-(2a*S*<sup>\*</sup>,2a<sup>1</sup>*S*<sup>\*</sup>,4a*S*<sup>\*</sup>,6a*S*<sup>\*</sup>)-1,3-bis(4-methoxyphenyl)hexahydro-1,3,5-triazacyclopenta-[*cd*]-pentalene-2,4,6(1*H*)-trione (*rac*-16)**

To a slurry of *rac*-15 (500 mg, 1.10 mmol) in AcOH (30.0 mL) was carefully added palladium on activated charcoal (10 wt. %, 117 mg, 0.110 mmol). The mixture was stirred at 70 °C under H<sub>2</sub> (4 atm) for five days. After that time the reaction was cooled to room temperature and the vessel was carefully opened to air. The reaction mixture was filtered through a pad of celite. The celite was washed with CHCl<sub>3</sub> (2 x 20 mL). The combined filtrate was concentrated under reduced pressure, resulting in a light-yellow solid, which was precipitated in EtOH. The precipitate was filtered and dried, affording *rac*-16 as a white solid (345 mg, 79%).

**<sup>1</sup>H NMR** (400 MHz, DMSO) δ 8.97 (s, 1H), 7.52 – 7.39 (m, 4H), 7.02 – 6.87 (m, 4H), 4.93 (d, *J* = 9.9 Hz, 1H), 4.79 (d, *J* = 9.7 Hz, 1H), 4.31 (dd, *J* = 9.6, 1.4 Hz, 1H), 3.94 (q, *J* = 9.7 Hz, 1H), 3.76 (d, *J* = 9.1 Hz, 6H) ppm.

**<sup>13</sup>C NMR** (101 MHz, DMSO) δ 172.17, 171.09, 169.12, 157.42, 157.13, 130.39, 130.28, 126.08, 125.47, 113.78, 113.61, 62.02, 60.56, 56.25, 55.26, 55.21, 31.45 ppm.

**HRMS** (ESI<sup>+</sup>) *m/z*: [M+H]<sup>+</sup> Calcd for C<sub>21</sub>H<sub>20</sub>N<sub>3</sub>O<sub>5</sub> 394.1403; Found 453.1396.

**Elemental analysis** Calcd (%) for C<sub>21</sub>H<sub>19</sub>N<sub>3</sub>O<sub>5</sub>: C 64.12, H 4.87, N 10.68; Found: C 63.72, H 4.97, N 10.63.

**IR** (neat)  $\nu_{\text{max}}$  3246 (br), 1696 (s), 1512 (s), 1249 (m), 1180 (w), 1031 (w) cm<sup>-1</sup>.

**Melting point:** Decomposes at 233 °C.

**R<sub>f</sub>** = 0.3 (MeOH/EtOAc, 1 : 9, v/v).

**Resolution of *rac*-16 by chiral preparative HPLC**

The racemic compound *rac*-16 (998.6 mg) was separated by preparative HPLC, yielding (–)-16 as a white powder (453.2 mg, 90%, *ee* > 99%, [ $\alpha$ ]<sub>D</sub><sup>25</sup>: -69.8 (*c* = 1.00 in MeCN)) and (+)-16 as a white powder (448.7 mg, 89%, *ee* > 99%).

**Preparative chiral HPLC method:** CHIRALPAK®IA 5 μm – 250 x 30 mm, MeCN, flow rate

= 42.4 mL/min,  $\lambda$  = 290 nm, T = 25 °C,  $t_R$  = 5.3 min (major), 8.3 min (minor)

**Analytical chiral HPLC method:** CHIRALPAK®IA 5  $\mu$ m – 250 x 4.6 mm, MeCN, flow rate = 1.0 mL/min,  $\lambda$  = 290 nm, T = 25 °C,  $t_R$  = 5.3 min (major), 8.3 min (minor).

**Table S1.** HPLC chromatogram of *rac*-16.

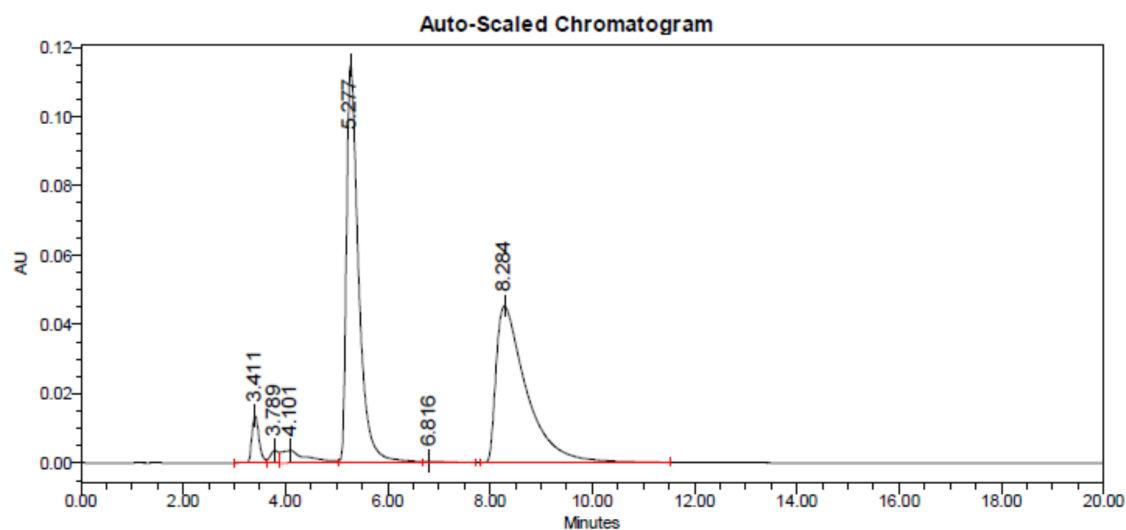

| Peak | Retention time (min) | Area (%) |
|------|----------------------|----------|
| 1    | 5.277                | 50.51    |
| 2    | 8.284                | 49.49    |

**Table S2.** HPLC chromatogram of (–)-16.

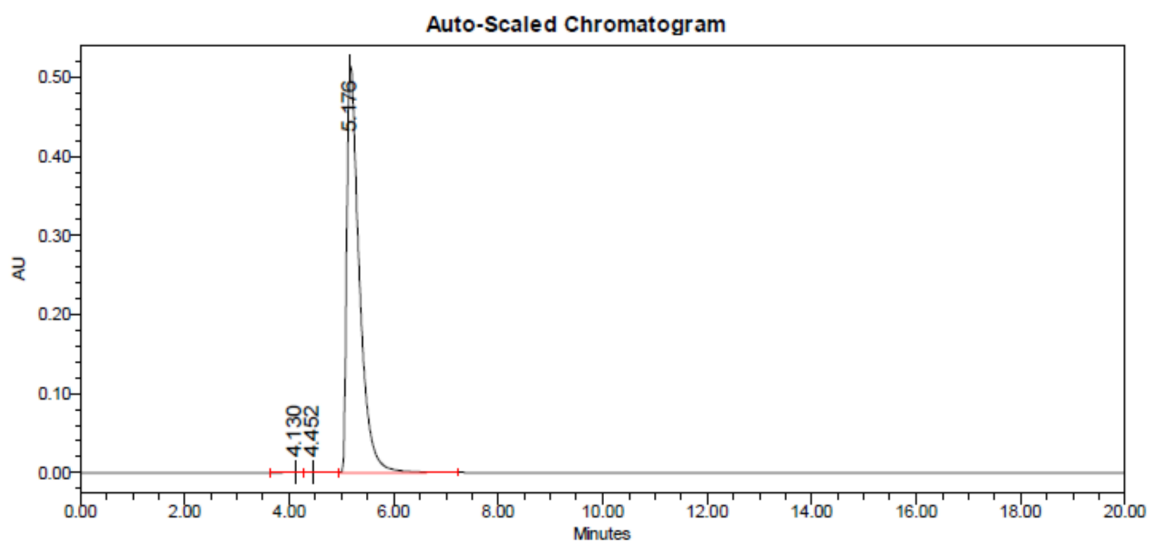

| Peak | Retention time (min) | Area (%) |
|------|----------------------|----------|
| 1    | 5.176                | 100      |
| 2    | -                    | LoD      |

**Table S3.** HPLC chromatogram of (+)-**16**.

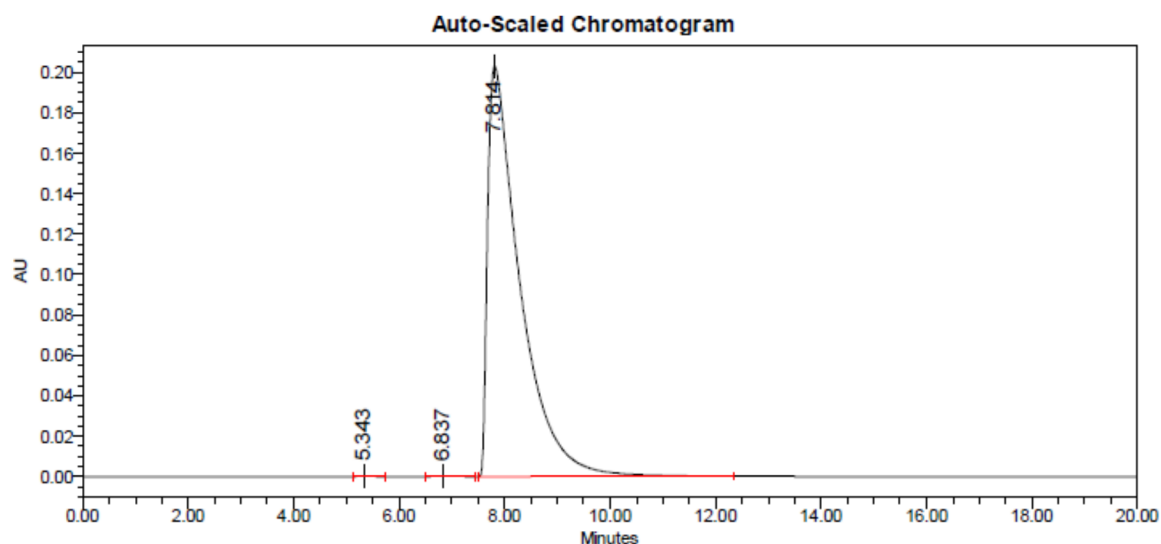

| Peak | Retention time (min) | Area (%) |
|------|----------------------|----------|
| 1    | -                    | LoD      |
| 2    | 7.814                | 100      |

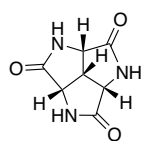

***rac*-(2a*S*\*,4a*S*\*,6a*S*\*)-hexahydro-1,3,5-triazacyclopenta[*cd*]pentalene-2,4,6(1*H*)-trione (*rac*-1)**

To a slurry of **16** (393 mg, 1.00 mmol) in MeCN (5.00 mL) at 0 °C was added dropwise an aqueous solution of cerium ammonium nitrate (CAN) (3.62 g CAN dissolved in 5.00 mL water, 6.60 mmol). The mixture was stirred at 0 °C for 1 h. The crude was concentrated to one third volume under reduced pressure and subjected to ionic exchange chromatography, yielding a yellowish solid which was further purified by preparative reverse phase HPLC. The product was obtained as a white crystalline solid (113 mg, 62%).

**Preparative reverse phase HPLC method:** Programmed elution from H<sub>2</sub>O (with 0.1% HCOOH)/MeCN 95:5 to pure MeCN, 20.0 mL/min,  $\lambda$  = 224 nm, T = 25 °C. The product was eluted from 2.6 min to 3.5 min.

**<sup>1</sup>H NMR** (400 MHz, DMSO-*d*<sub>6</sub>)  $\delta$  8.73 (s, 3H), 3.98 (dd, *J* = 9.4, 1.3 Hz, 3H), 3.76 – 3.68 (m, 1H) ppm.

**<sup>13</sup>C NMR** (101 MHz, DMSO-*d*<sub>6</sub>)  $\delta$  174.02, 55.85, 35.58 ppm.

**HRMS** (ESI+) *m/z*: [M+H]<sup>+</sup> Calcd for C<sub>7</sub>H<sub>8</sub>N<sub>3</sub>O<sub>3</sub> 182.0566; Found 182.0560.

**Elemental analysis** Calcd (%) for C<sub>7</sub>H<sub>7</sub>N<sub>3</sub>O<sub>3</sub>: C 46.41, H 3.90, N 23.20; Found: C 46.37, H 3.89, N 23.19.

**IR** (neat)  $\nu_{\max}$  3212 (br), 1662 (m), 1415 (m), 1298 (m), 1260 (m), 1091 (m), 1007 (w) cm<sup>-1</sup>.

**Melting point:** >250 °C.

**R<sub>f</sub>:** 0.3 (MeOH/EtOAc, 1 : 1, v/v). Stains yellow with KMnO<sub>4</sub> stain after heating to > 200 °C.

**Analytical chiral HPLC method:** CHIRALPAK®IA 5  $\mu$ m – 250 x 4.6 mm, MeOH/EtOH (1 : 1, v/v), flow rate = 1.0 mL/min,  $\lambda$  = 200 nm, T = 25 °C, *t<sub>R</sub>* = 7.3 min (major), 11.0 min (minor).

**Table S4.** HPLC chromatogram of *rac*-1.

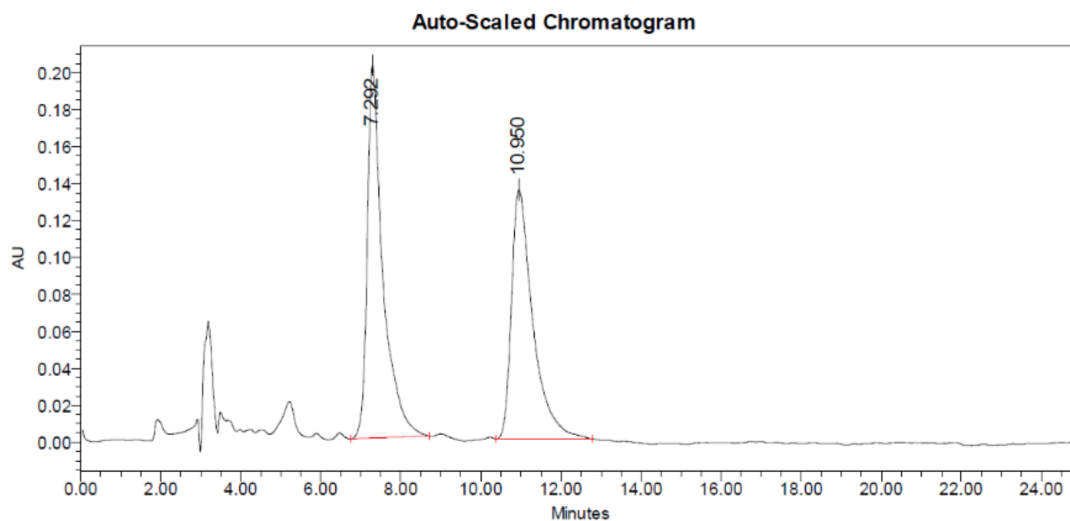

| Peak | Retention time (min) | Area (%) |
|------|----------------------|----------|
| 1    | 7.292                | 52.29    |
| 2    | 10.950               | 47.71    |

**(+)-(2*aS*,4*aS*,6*aS*)-hexahydro-1,3,5-triazacyclopenta[*cd*]pentalene-2,4,6(1*H*)-trione ((+)-(SSS)-1)**

To a slurry of (–)-**16** (393 mg, 1.00 mmol) in MeCN (5.00 mL) at 0 °C was added dropwise an aqueous solution of cerium ammonium nitrate (CAN) (3.62 g CAN dissolved in 5.00 mL water, 6.60 mmol). The mixture was stirred at 0 °C for 1 h. The crude was concentrated to one third volume under reduced vacuum and subjected to an ionic exchange column, yielding a yellowish solid which was further purified by preparative reverse phase HPLC. The product was obtained as a white crystalline solid (98.0 mg, 54%).

**Preparative reverse phase HPLC method:** Programmed elution from H<sub>2</sub>O (with 0.1% HCOOH)/MeCN (95 : 5, v/v) to pure MeCN, 20.0 mL/min,  $\lambda$  = 224 nm, T = 25 °C. The product was eluted from 2.6 min to 3.5 min.

**<sup>1</sup>H NMR** (400 MHz, DMSO)  $\delta$  8.73 (s, 3H), 3.98 (dd, *J* = 9.4, 1.3 Hz, 3H), 3.78 – 3.67 (m, 1H) ppm.

**<sup>13</sup>C NMR** (101 MHz, DMSO)  $\delta$  174.00, 55.83, 35.56 ppm.

**HRMS** (ESI+) *m/z*: [M+Na]<sup>+</sup> Calcd for C<sub>7</sub>H<sub>8</sub>N<sub>3</sub>O<sub>3</sub> 204.0385; Found 204.0382.

**R<sub>f</sub>**: 0.3 (MeOH/EtOAc, 1 : 1, v/v). Stains yellow with KMnO<sub>4</sub> stain under heat over 200 °C.

**Optical rotation:**  $[\alpha]_D^{25}$ : 53.4 (*c* = 1.00 in H<sub>2</sub>O)

**Analytical chiral HPLC method:** CHIRALPAK®IA 5  $\mu$ m – 250 x 4.6 mm, MeOH/EtOH (1 : 1, v/v), flow rate = 1.0 mL/min,  $\lambda$  = 210 nm, T = 25 °C, *t<sub>R</sub>* = 11.3 min.

**Table S5.** HPLC chromatogram of (+)-**1**.

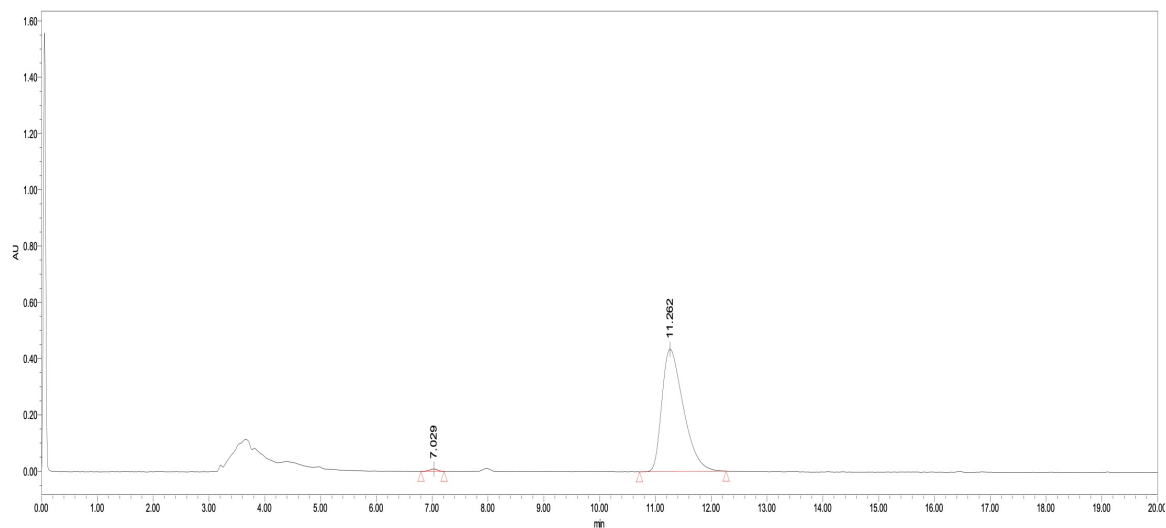

| Peak | Retention time (min) | Area (%) |
|------|----------------------|----------|
| 1    | -                    | LoD      |
| 2    | 11.282               | 100      |

### 3. Assignment of the absolute configuration of (+)-**1**

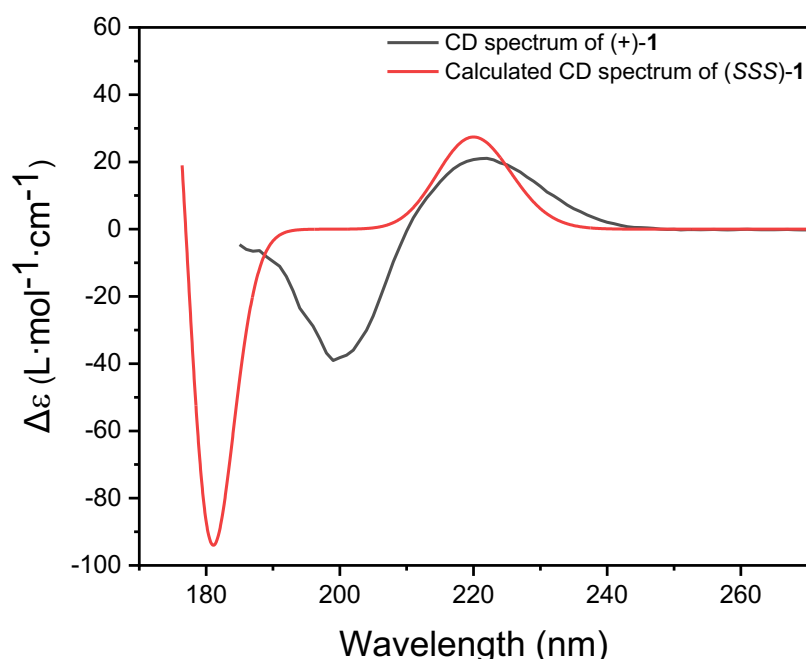

**Figure S1.** Experimental (gray) and calculated (red) molar circular extinction of (+)-**1**.

#### Experimental molar circular extinction:

The calculation of the molar circular extinction was done by the following equation:

$$\Delta\epsilon = \frac{mdeg * M}{c * l * 32.98 * 1000}$$

where *mdeg* is the reported millidegrees from the CD experiment, *M* is the molecular weight of the compound (181.15 g/mol), *c* is the concentration of the solution (0.06 g/L), *l* is the path length of the light (0.2 cm), and  $\Delta\epsilon$  is the difference of extinction coefficients for left and right circularly polarized light, respectively.

#### Technical Details of the Calculations:

The quantum chemical calculations were carried out with the TURBOMOLE suite of programs. [2] The  $C_3$  symmetric structure of the compound was fully optimized at the dispersion-corrected DFT level using the recent r2SCAN-3c composite density functional [3] employing the COSMO continuum solvation model for water. [4] The COSMO model was also used in all response calculations. Electronic circular dichroism spectra (ECD) as well as optical rotation (OR) at the sodium D-line wavelength  $[\alpha]_D$  were computed at the linear response DFT (TDDFT) level [5]

in combination with large augmented AO basis sets (def2-TZVPD <sup>[6]</sup>) and the wB97X-D3 range-separated hybrid density functional. <sup>[7]</sup> In the CD calculations, the 20 lowest electronic transitions have been considered that are broadened with Gaussian shape functions of 0.3 eV width at 1/e height for the simulated spectra. The gauge-invariant velocity form was used for the computation of the transition moments while the OR calculations employed the dipole-length form for technical reasons. Test calculations with the velocity form at the PBE/def2-TZVPD level yielded very similar results (difference < 1 % for the OR), indicating that the AO basis set is rather complete.

The results of the CD calculations show, in agreement with the experimental spectra, a medium intensity band of positive CD sign centered around 220 nm resulting from amide type  $n \rightarrow \pi^*$  transitions. A negative Cotton effect observed experimentally at about 200 nm is computed with roughly the right negative intensity at about 180 nm and can be assigned to  $\pi \rightarrow \pi^*$  transitions. In addition, the computed OR of 70.8 deg/(dm<sup>3</sup>g/mL) compares well with the experimental value of 53.4 deg/(dm<sup>3</sup>g/mL) measured in water allowing a definite assignment of the absolute configuration as (+)-SSS.

**Table S6.** Cartesian coordinates of the (+)-SSS configuration in Angstrom at the r2SCAN-3c (COSMO, H<sub>2</sub>O) level.

| Atom | x          | y          | z          |
|------|------------|------------|------------|
| C    | 0.0377134  | -1.4254875 | -0.4531351 |
| C    | 0.0095321  | -0.0049442 | -1.0518243 |
| N    | -1.1387751 | -1.4928718 | 0.4109456  |
| C    | 1.3357097  | -1.4810538 | 0.3631455  |
| C    | -1.2546867 | 0.6679100  | -0.4866497 |
| C    | 1.1983894  | 0.7442160  | -0.4176235 |
| C    | -1.8912445 | -0.3849972 | 0.4254121  |
| N    | 1.8859247  | -0.2610013 | 0.3865578  |
| H    | 0.0326411  | -2.2307102 | -1.1964670 |
| H    | 0.0391509  | -0.0043321 | -2.1401477 |



---

|   |            |            |            |
|---|------------|------------|------------|
| H | -1.3565134 | -2.3125267 | 0.9770705  |
| O | 1.7893848  | -2.5082732 | 0.8926816  |
| H | -1.9734332 | 1.0058588  | -1.2398641 |
| N | -0.7646803 | 1.7759176  | 0.3276585  |
| C | 0.5637603  | 1.8504991  | 0.4372176  |
| H | 1.8817838  | 1.1955506  | -1.1455239 |
| O | -2.9246454 | -0.1961933 | 1.0873578  |
| H | 2.7188827  | -0.0478418 | 0.9299120  |
| O | 1.2006101  | 2.6767059  | 1.1109206  |
| H | -1.3895043 | 2.4335750  | 0.7899644  |

---

#### 4. Single crystal X-ray diffraction (scXRD) analysis of *rac*-**13**, *rac*-**1**-d<sub>3</sub>, and (+)-(*SSS*)-**1**

Single crystals covered in paratone oil were cut to size and mounted on a MiTeGen micro-mount loop. Data collection was performed on an Agilent Xcalibur Sapphire3 or an Agilent Enhance diffractometer equipped with a MoK $\alpha$  high-brilliance I $\mu$ S radiation source ( $\lambda$  = 0.71073 Å). Absorption was corrected for using multi-scan empirical absorption correction with spherical harmonics as implemented in the SCALE3 ABSPACK scaling algorithm. [8] The structures were solved in WinGX [9] using SUPERFLIP [10] or SHELXL 2016/4 [11] and refined using SHELXL 2016/4. Non-hydrogen atoms were refined anisotropically. A disordered ethyl group in *rac*-**13** was modeled with a refined occupancy over two positions using the PART instruction. Hydrogen bond tables are generated with the HTAB command. Hydrogen bonds from C–H are not included in the tables.

**Table S7** Crystal data for *rac*-**13**.<sup>a</sup> *Crystallization*: A solution of *rac*-**13** (17 mg) in EtOAc (5 mL) was slowly evaporated in air. After two days, single crystals suitable for X-ray analysis were obtained.

|                                                              |                                                                 |                           |
|--------------------------------------------------------------|-----------------------------------------------------------------|---------------------------|
| Chemical formula                                             | C <sub>23</sub> H <sub>24</sub> N <sub>2</sub> O <sub>6</sub>   |                           |
| Formula weight                                               | 424.44                                                          |                           |
| Collection temperature /K                                    | 293(2)                                                          |                           |
| Crystal size /mm <sup>3</sup>                                | 0.3 x 0.1 x 0.1                                                 |                           |
| Crystal habit                                                | colorless, rod                                                  |                           |
| Wavelength /Å                                                | 0.71073                                                         |                           |
| Crystal system                                               | Monoclinic                                                      |                           |
| Space group                                                  | <i>P</i> 2 <sub>1</sub> / <i>c</i>                              |                           |
| Unit cell dimensions:                                        | <i>a</i> = 13.6019(6) Å                                         | $\alpha = 90^\circ$       |
|                                                              | <i>b</i> = 16.1146(7) Å                                         | $\beta = 91.538(4)^\circ$ |
|                                                              | <i>c</i> = 9.4624(4) Å                                          | $\gamma = 90^\circ$       |
| Unit cell volume /Å <sup>3</sup>                             | 2073.31(16)                                                     |                           |
| Z, Calculated density /Mg/m <sup>3</sup>                     | 4, 1.360                                                        |                           |
| Radiation type                                               | MoK $\alpha$                                                    |                           |
| Absorption coefficient, m/mm <sup>-1</sup>                   | 0.099                                                           |                           |
| No. reflections collected / unique                           | 16114 / 4942                                                    |                           |
| <i>R</i> <sub>int</sub>                                      | 0.0450                                                          |                           |
| Completeness to theta = 25.000 /%                            | 99.8                                                            |                           |
| Data / restraints / parameters                               | 4942/ 0 / 303                                                   |                           |
| Goodness of fit on <i>F</i> <sup>2</sup>                     | 1.051                                                           |                           |
| Final <i>R</i> indices ( <i>I</i> > 2 $\sigma$ ( <i>I</i> )) | <i>R</i> <sub>1</sub> = 0.0526, <i>wR</i> <sub>2</sub> = 0.1029 |                           |
| <i>R</i> indices (all data)                                  | <i>R</i> <sub>1</sub> = 0.0912, <i>wR</i> <sub>2</sub> = 0.1233 |                           |
| Absolute structure parameter                                 | —                                                               |                           |
| Largest diff. peak and hole /e-/Å <sup>3</sup>               | 0.218 and -0.226                                                |                           |
| CCDC                                                         | 2128471                                                         |                           |

<sup>a</sup> The ethyl group was modeled as disordered over two positions with a refined population of 55:45.

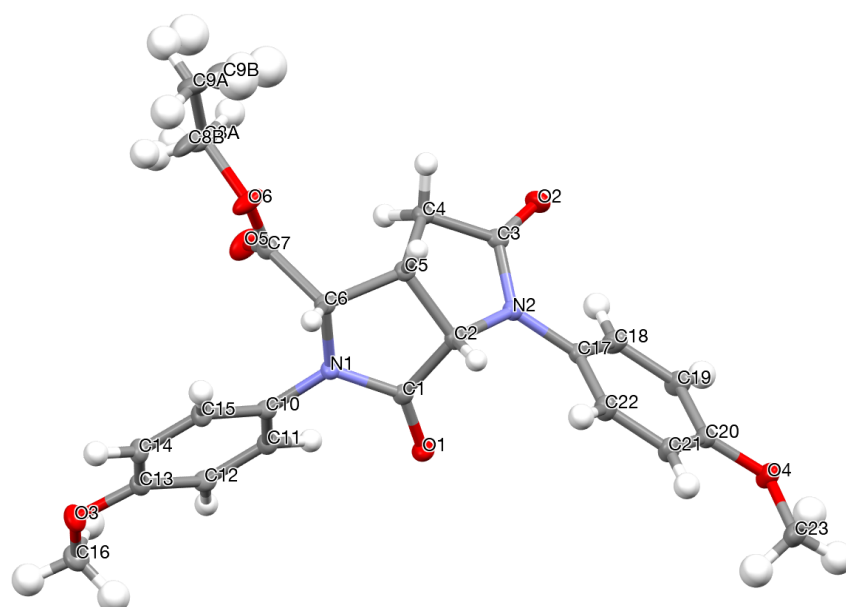

**Figure S2.** Asymmetric unit of *rac*-**13**. Gray = carbon atom; blue = nitrogen atom; red = oxygen atom; white = hydrogen atom. Thermal ellipsoids are shown at 30% probability.

**Table S8.** Crystal data for *rac-1-d<sub>3</sub>*.<sup>a</sup> *Crystallization:* In an NMR tube, a solution of *rac-1* (21 mg) in warm D<sub>2</sub>O (70 °C, 0.6 mL) was cooled slowly to room temperature with a speed of 3 °C per 30 min. After 5 h, single crystals suitable for X-ray analysis were obtained.

|                                                              |                                                                            |                             |
|--------------------------------------------------------------|----------------------------------------------------------------------------|-----------------------------|
| Chemical formula                                             | C <sub>7</sub> H <sub>4</sub> D <sub>3</sub> N <sub>3</sub> O <sub>3</sub> |                             |
| Formula weight                                               | 184.17                                                                     |                             |
| Collection temperature /K                                    | 293(2)                                                                     |                             |
| Crystal size /mm <sup>3</sup>                                | 0.3 x 0.2 x 0.1                                                            |                             |
| Crystal habit                                                | colorless, rod                                                             |                             |
| Wavelength /Å                                                | 0.71073                                                                    |                             |
| Crystal system                                               | Monoclinic                                                                 |                             |
| Space group                                                  | <i>P</i> 2 <sub>1</sub> / <i>c</i>                                         |                             |
| Unit cell dimensions:                                        | <i>a</i> = 7.2905(7) Å                                                     | $\alpha = 90^\circ$         |
|                                                              | <i>b</i> = 11.3194(9) Å                                                    | $\beta = 111.738(12)^\circ$ |
|                                                              | <i>c</i> = 9.0781(10) Å                                                    | $\gamma = 90^\circ$         |
| Unit cell volume /Å <sup>3</sup>                             | 695.89(13)                                                                 |                             |
| Z, Calculated density /Mg/m <sup>3</sup>                     | 4, 1.758                                                                   |                             |
| Radiation type                                               | MoK $\alpha$                                                               |                             |
| Absorption coefficient, m/mm <sup>-1</sup>                   | 0.139                                                                      |                             |
| No. reflections collected / unique                           | 4010 / 1622                                                                |                             |
| <i>R</i> <sub>int</sub>                                      | 0.0249                                                                     |                             |
| Completeness to theta = 25.000 /%                            | 99.8                                                                       |                             |
| Data / restraints / parameters                               | 1622 / 0 / 127                                                             |                             |
| Goodness of fit on <i>F</i> <sup>2</sup>                     | 1.054                                                                      |                             |
| Final <i>R</i> indices ( <i>I</i> > 2 $\sigma$ ( <i>I</i> )) | <i>R</i> <sub>1</sub> = 0.0518, <i>wR</i> <sub>2</sub> = 0.1077            |                             |
| <i>R</i> indices ( <i>all data</i> )                         | <i>R</i> <sub>1</sub> = 0.0713, <i>wR</i> <sub>2</sub> = 0.1184            |                             |
| Absolute structure parameter                                 | —                                                                          |                             |
| Largest diff. peak and hole /e-/Å <sup>3</sup>               | 0.260 and -0.246                                                           |                             |
| CCDC                                                         | 2128470                                                                    |                             |

<sup>a</sup> Because of chemical exchange with D<sub>2</sub>O during crystallization, protic groups were modeled with deuterium atoms at the exchanging positions.

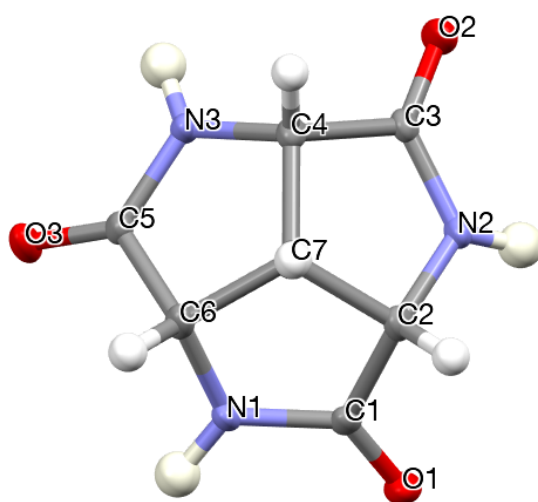

**Figure S3.** Asymmetric unit of *rac-1-d<sub>3</sub>*. Gray = carbon atom; blue = nitrogen atom; red = oxygen atom; white = hydrogen/deuterium atom. Thermal ellipsoids are shown at 30% probability.

**Table S9.** Hydrogen bonds for *rac*-**1** (Å and deg.)<sup>a</sup>

| <b>D–H...A</b>     | <b>d(D–H)</b> | <b>d(H...A)</b> | <b>d(D...A)</b> | <b>&lt;(DHA)</b> |
|--------------------|---------------|-----------------|-----------------|------------------|
| N(3)–D(1)...O(1)#1 | 0.85(2)       | 2.58(2)         | 3.036(2)        | 114.7(17)        |
| N(3)–D(1)...O(3)#2 | 0.85(2)       | 2.21(2)         | 2.970(2)        | 149(2)           |
| N(1)–D(2)...O(3)#3 | 0.91(2)       | 2.18(2)         | 2.908(2)        | 136.3(18)        |
| N(2)–D(3)...O(2)#4 | 0.82(2)       | 2.18(2)         | 2.981(2)        | 166(2)           |

(a) Symmetry transformations used to generate equivalent atoms:

#1 [x-1, -y+3/2, z-1/2]    #2 [-x, -y+2, -z+2]    #3 [-x+1, -y+2, -z+2]    #4 [-x, -y+1, -z+2]

**Table S10.** Crystal data for (+)-(SSS)-1.<sup>a</sup> *Crystallization:* In an NMR tube, a solution of (+)-(SSS)-1 (10 mg) in water (0.3 mL) was carefully covered by a layer of MeCN (0.5 mL). After 16 h, crystals comprising of intergrowing phases were obtained. Suitable crystals that appeared homogenous in plane polarized light were cut to size with a scalpel and mounted. Data was collected for several crystals, each exhibiting severe twinning. The raised R values reflect overlapping peaks and untreated residual twinning.

|                                                     |                                                                                                  |                           |
|-----------------------------------------------------|--------------------------------------------------------------------------------------------------|---------------------------|
| Chemical formula                                    | 2(C <sub>7</sub> H <sub>7</sub> N <sub>3</sub> O <sub>3</sub> ), C <sub>2</sub> H <sub>3</sub> N |                           |
| Formula weight                                      | 403.36                                                                                           |                           |
| Collection temperature /K                           | 293(2)                                                                                           |                           |
| Crystal size /mm <sup>3</sup>                       | 0.2 x 0.2 x 0.2                                                                                  |                           |
| Crystal habit                                       | colorless, irregular                                                                             |                           |
| Wavelength /Å                                       | 0.71073                                                                                          |                           |
| Crystal system                                      | Monoclinic                                                                                       |                           |
| Space group                                         | P2 <sub>1</sub>                                                                                  |                           |
| Unit cell dimensions:                               | <i>a</i> = 10.2416(18) Å                                                                         | $\alpha = 90^\circ$       |
|                                                     | <i>b</i> = 9.0837(12) Å                                                                          | $\beta = 117.25(2)^\circ$ |
|                                                     | <i>c</i> = 10.5564(16) Å                                                                         | $\gamma = 90^\circ$       |
| Unit cell volume /Å <sup>3</sup>                    | 873.1(3)                                                                                         |                           |
| Z, Calculated density /Mg/m <sup>3</sup>            | 2, 1.534                                                                                         |                           |
| Radiation type                                      | MoK $\alpha$                                                                                     |                           |
| Absorption coefficient, m/mm <sup>-1</sup>          | 0.121                                                                                            |                           |
| No. reflections collected / unique                  | 10598 / 10598                                                                                    |                           |
| <i>R</i> <sub>int</sub>                             | <i>N/a</i>                                                                                       |                           |
| Completeness to theta = 25.000 /%                   | 99.6                                                                                             |                           |
| Data / restraints / parameters                      | 10598/ 1 / 266                                                                                   |                           |
| Goodness of fit on <i>F</i> <sup>2</sup>            | 1.048                                                                                            |                           |
| Final <i>R</i> indices ( <i>I</i> > 2σ( <i>I</i> )) | <i>R</i> <sub>1</sub> = 0.0784, w <i>R</i> <sub>2</sub> = 0.2705                                 |                           |
| <i>R</i> indices ( <i>all data</i> )                | <i>R</i> <sub>1</sub> = 0.1246, w <i>R</i> <sub>2</sub> = 0.2876                                 |                           |
| Absolute structure parameter                        | -0.5(10)                                                                                         |                           |
| Largest diff. peak and hole /e-/Å <sup>3</sup>      | 1.482 and -1.198                                                                                 |                           |
| CCDC                                                | 2128469                                                                                          |                           |

<sup>a</sup> The collected data was indexed as a four-fold twin and the structure modeled with a refined population of 41 : 28 : 28 : 3. The absolute configuration was assigned as described in the supporting information (page S15-17).

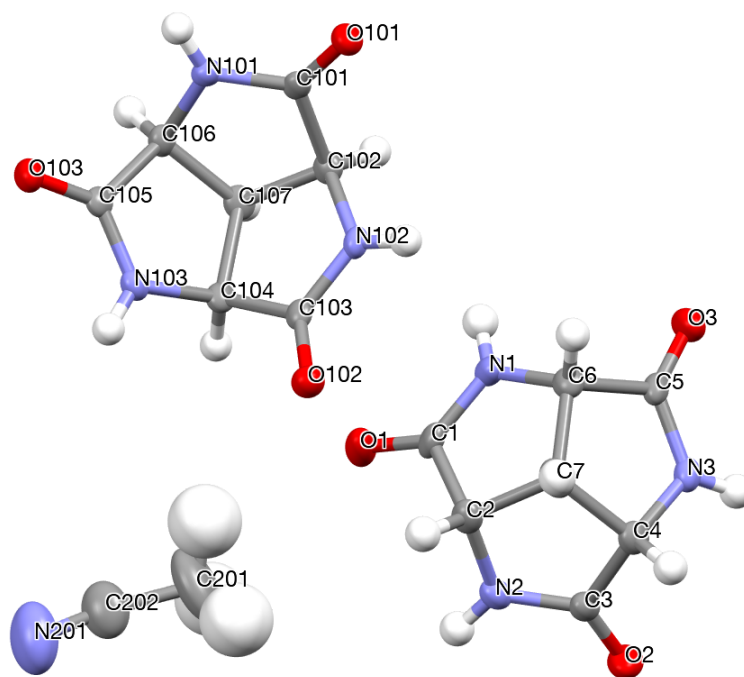

**Figure S4.** Asymmetric unit of (+)-(SSS)-1. Gray = carbon atom; blue = nitrogen atom; red = oxygen atom; white = hydrogen atom. Thermal ellipsoids are shown at 30% probability.

**Table S11.** Hydrogen bonds for (+)-(SSS)-1 (Å and deg.)<sup>a</sup>

| D–H...A                 | d(D–H) | d(H...A) | d(D...A)  | <(DHA) |
|-------------------------|--------|----------|-----------|--------|
| N(1)-H(1A)...O(103) #1  | 0.86   | 2.06     | 2.889(14) | 162.0  |
| N(2)-H(2A)...O(102) #2  | 0.86   | 2.12     | 2.966(13) | 168.4  |
| N(3)-H(3A)...O(101) #3  | 0.86   | 2.06     | 2.918(14) | 175.6  |
| N(101)-H(11A)...O(1) #4 | 0.86   | 1.99     | 2.815(15) | 160.7  |
| N(102)-H(12A)...O(3) #5 | 0.86   | 1.99     | 2.828(14) | 165.9  |
| N(103)-H(13A)...O(2) #6 | 0.86   | 1.92     | 2.778(13) | 171.6  |

(a) Symmetry transformations used to generate equivalent atoms:

#1 [-x, y+1/2, -z+1]      #2 [-x+1, y+1/2, -z+1]      #3 [-x+1, y+1/2, -z+2]      #4 [-x, y-1/2, -z+1]  
 #5 [-x+1, y-1/2, -z+2]      #6 [-x+1, y-1/2, -z+1]

*Modelled self-assembly structures of 1*

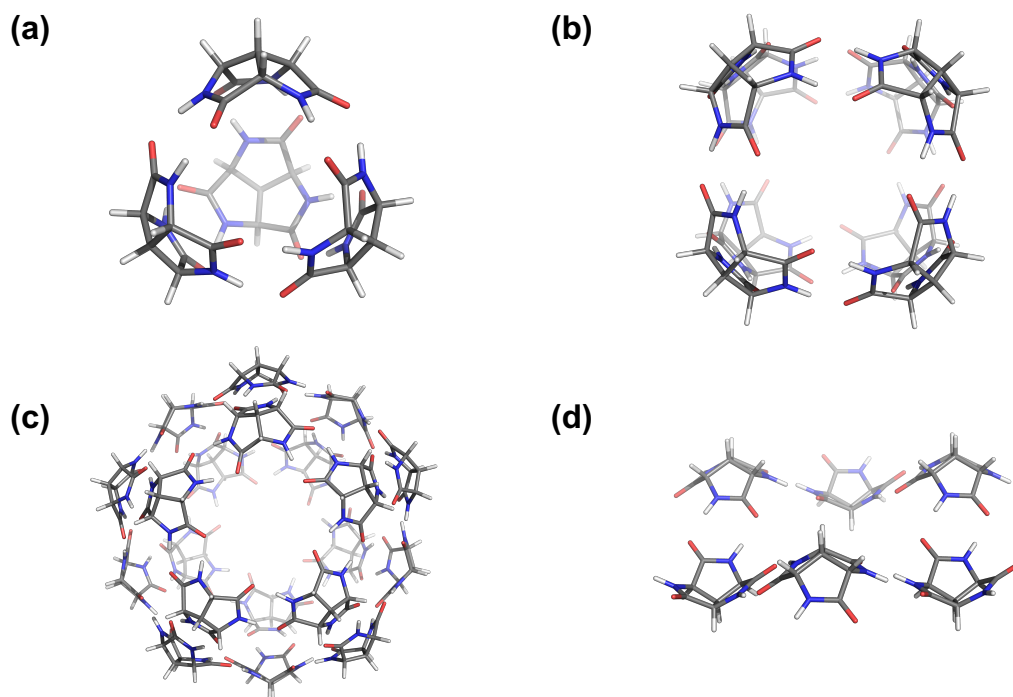

**Figure S5.** Illustration of possible self-assemblies from trilactam **1**. (a) A tetrahedron assembly (SSS)-**14**; (b) A cubic assembly (SSS)-**18**; (c) A dodecahedron assembly (SSS)-**120**; (d) A unit of an infinite non-planar hexagonal tiling that follows the graph set  $R_6^0(30)$  consisting of *rac*-**1**;



## 5. Preliminary self-assembly studies of *rac*-1 and (+)-(SSS)-1 in solution

### **General procedure for self-assemblies of *rac*-1 and (+)-(SSS)-1 with argon, methane, nitrogen and xenon**

To a solution of the trilactam (0.3 mg) in DMF-*d*<sub>7</sub> (0.6 mL) in an NMR tube was bubbled the gas through a syringe using a balloon for 30 min. The <sup>1</sup>H NMR spectrum of the sample was recorded before and after the bubbling.

### **General procedure for self-assemblies of *rac*-1 and (+)-(SSS)-1 with CHCl<sub>3</sub> and MeOH**

To a solution of the trilactam (0.3 mg) in DMF-*d*<sub>7</sub> (0.6 mL) in an NMR tube was added the guest (10 μL). The result mixture was sonicated for 2 min and kept for 30 min. The <sup>1</sup>H NMR spectrum of the sample was recorded before the addition and 30 min after the sonication.

6. Copies of  $^1\text{H}$  and  $^{13}\text{C}$  NMR spectra for *rac-12*, *rac-13*, *rac-14*, *rac-15*, *rac-16*, *rac-1* and (+)-(*SSS*)-**1**.

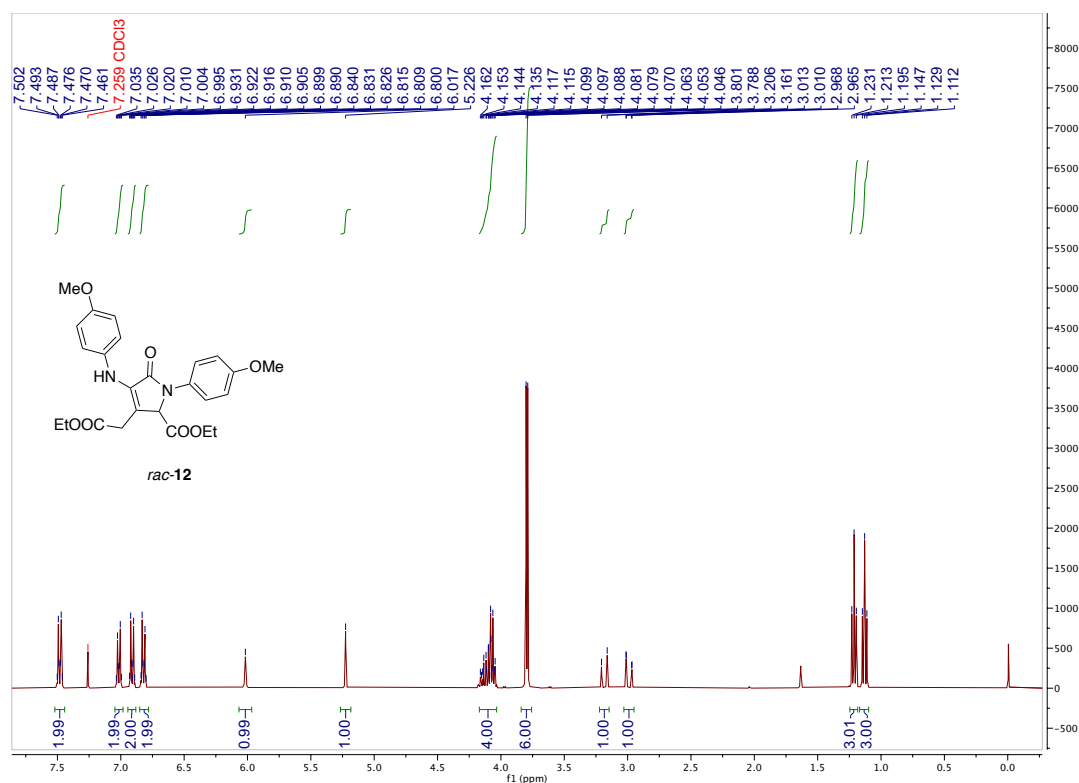

Figure S6.  $^1\text{H}$  NMR spectrum (400 MHz,  $\text{CDCl}_3$ ) of *rac-12*.

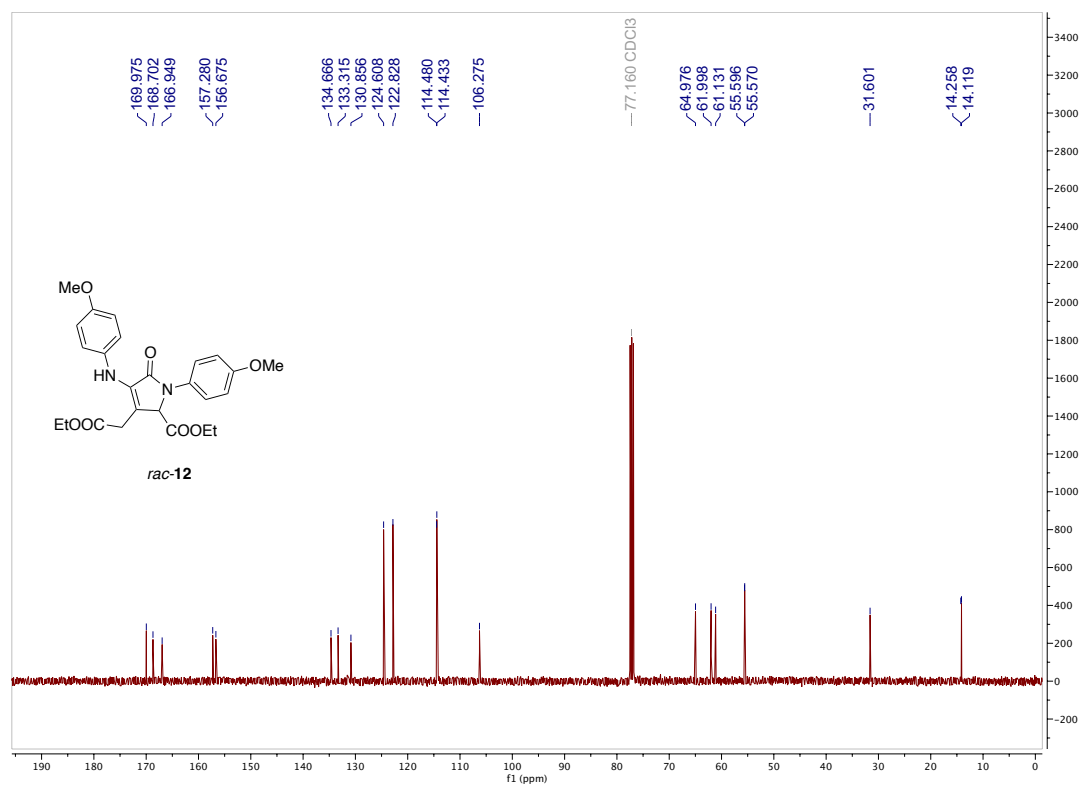

Figure S7.  $^{13}\text{C}$  NMR spectrum (101 MHz,  $\text{CDCl}_3$ ) of *rac-12*.

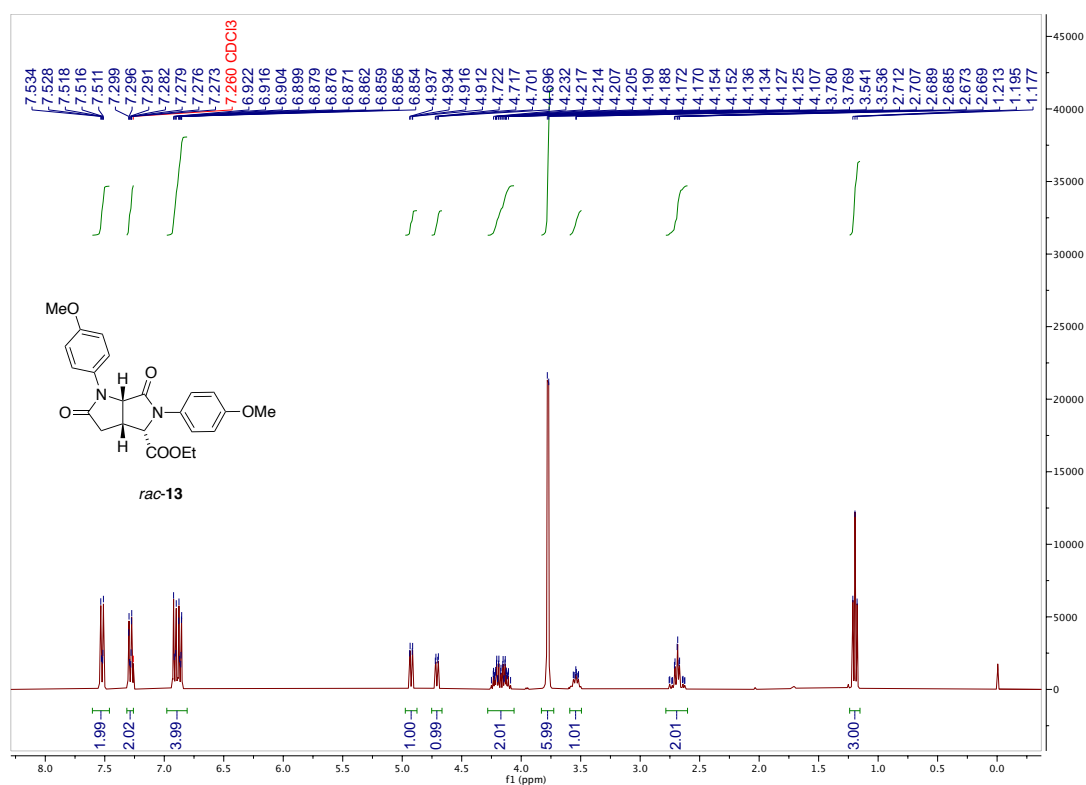

Figure S8. <sup>1</sup>H NMR spectrum (400 MHz, CDCl<sub>3</sub>) of *rac*-13.

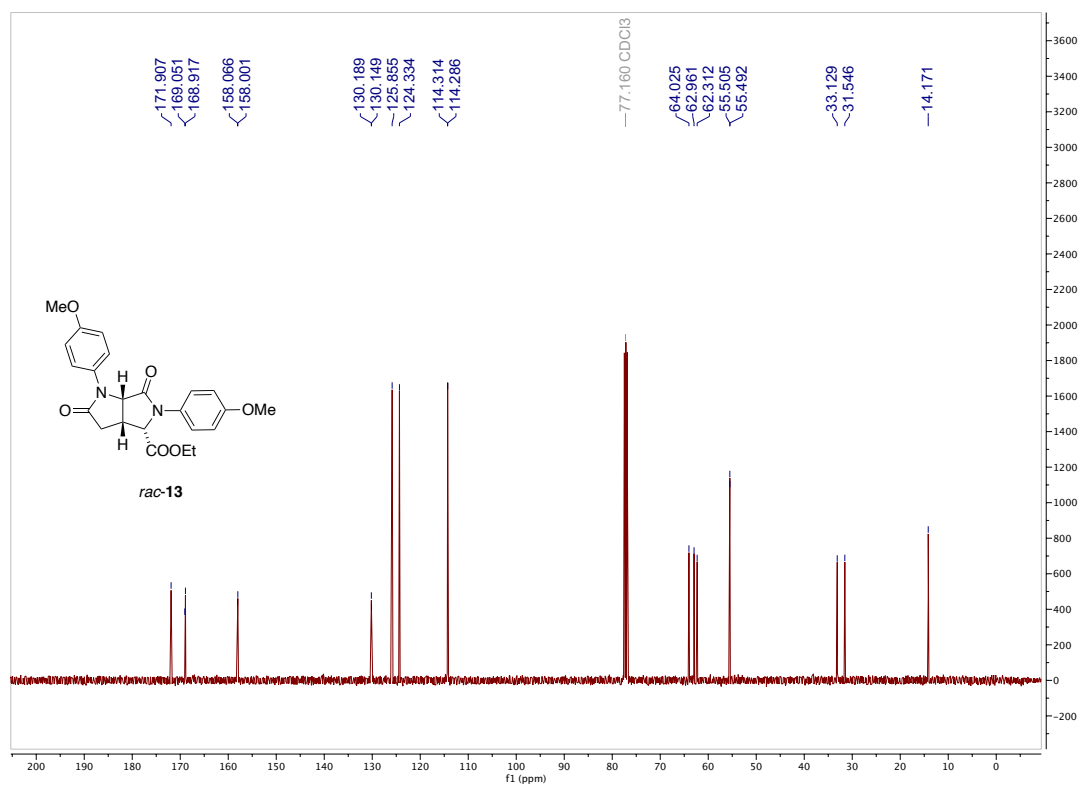

Figure S9. <sup>13</sup>C NMR spectrum (101 MHz, CDCl<sub>3</sub>) of *rac*-12.

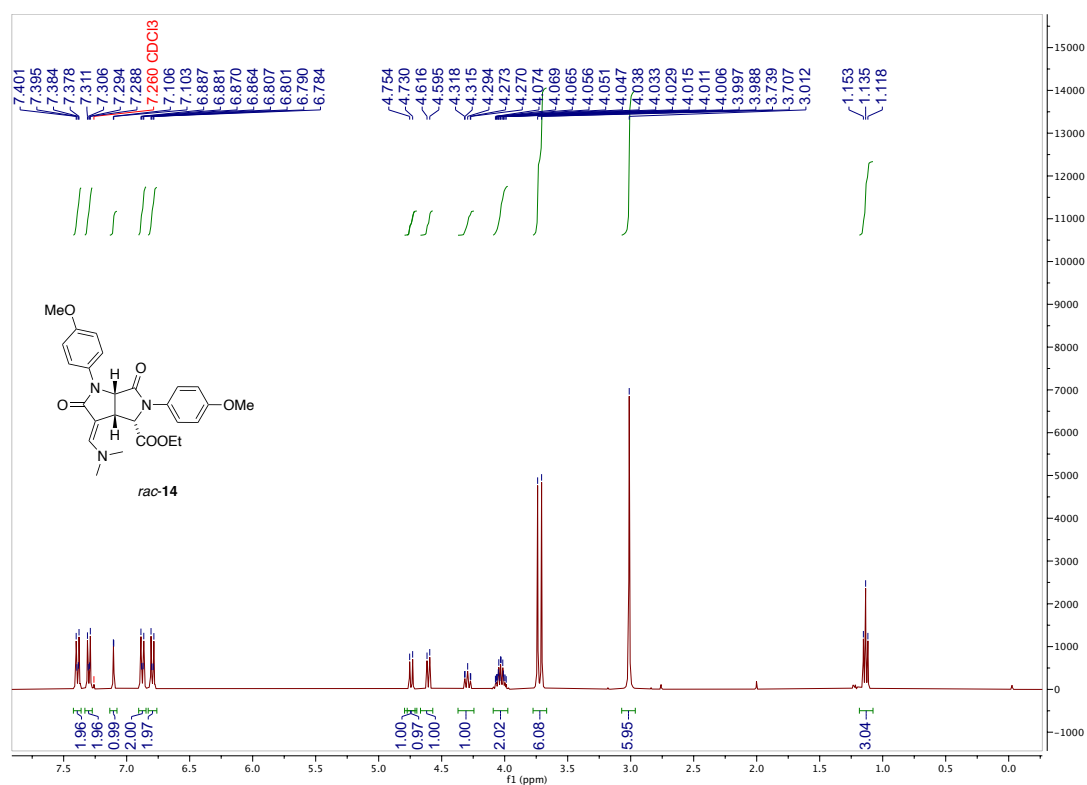

**Figure S10.** <sup>1</sup>H NMR spectrum (400 MHz, CDCl<sub>3</sub>) of *rac-14*.

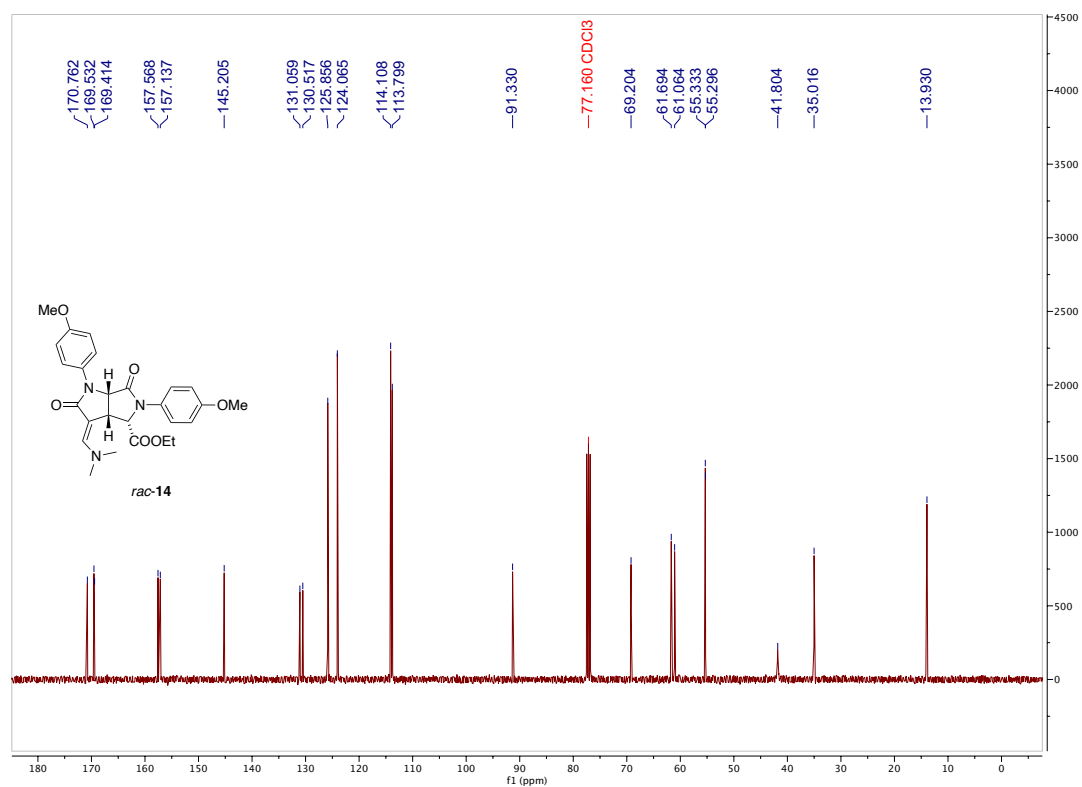

**Figure S11.** <sup>13</sup>C NMR spectrum (101 MHz, CDCl<sub>3</sub>) of *rac-14*.

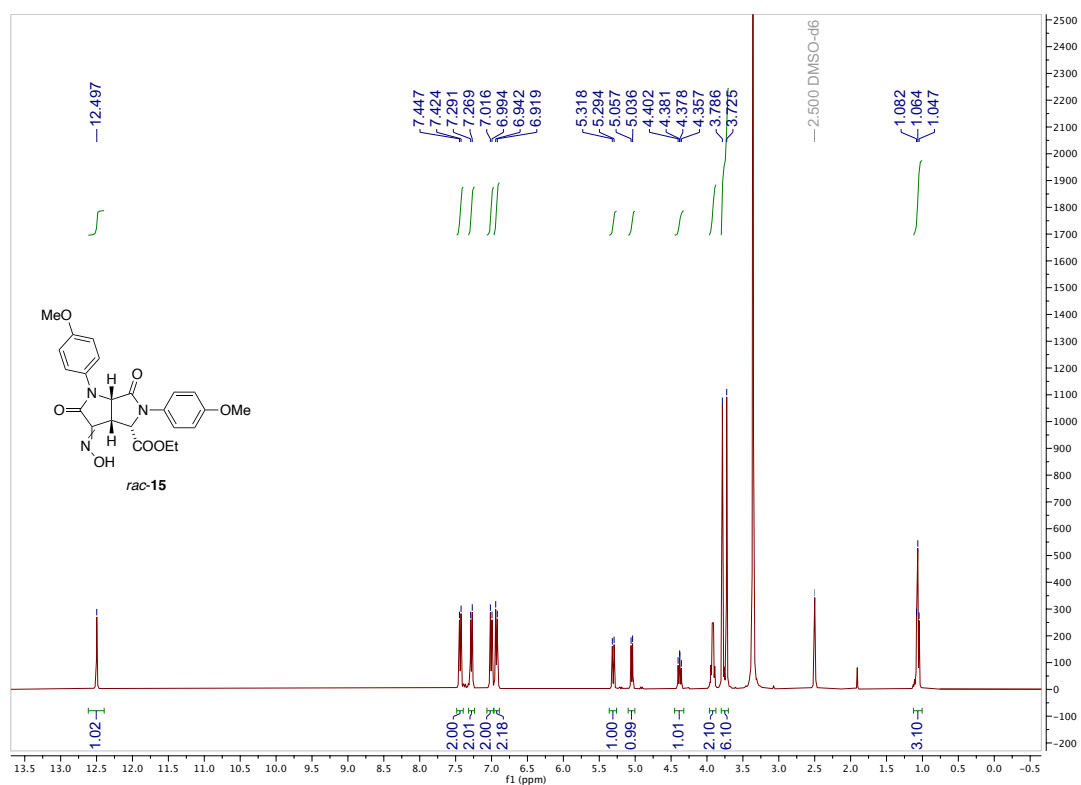

**Figure S12.** <sup>1</sup>H NMR spectrum (400 MHz, DMSO-*d*<sub>6</sub>) of *rac*-15.

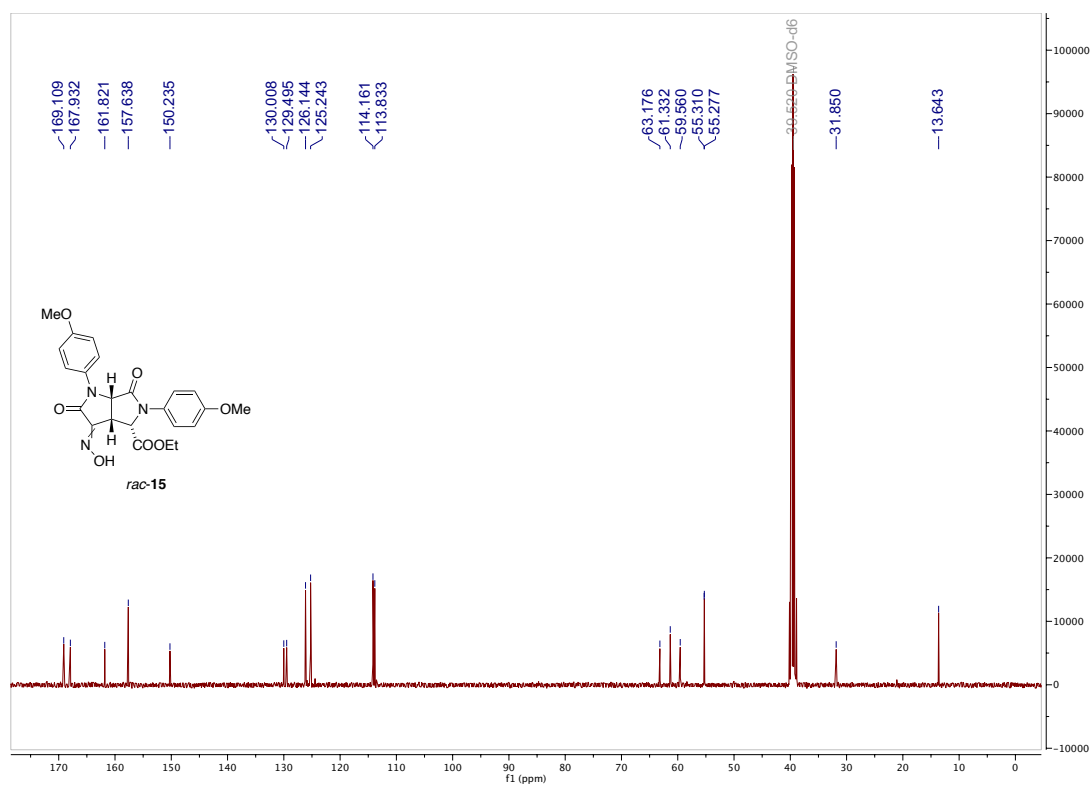

**Figure S13.** <sup>13</sup>C NMR spectrum (101 MHz, DMSO-*d*<sub>6</sub>) of *rac*-15.

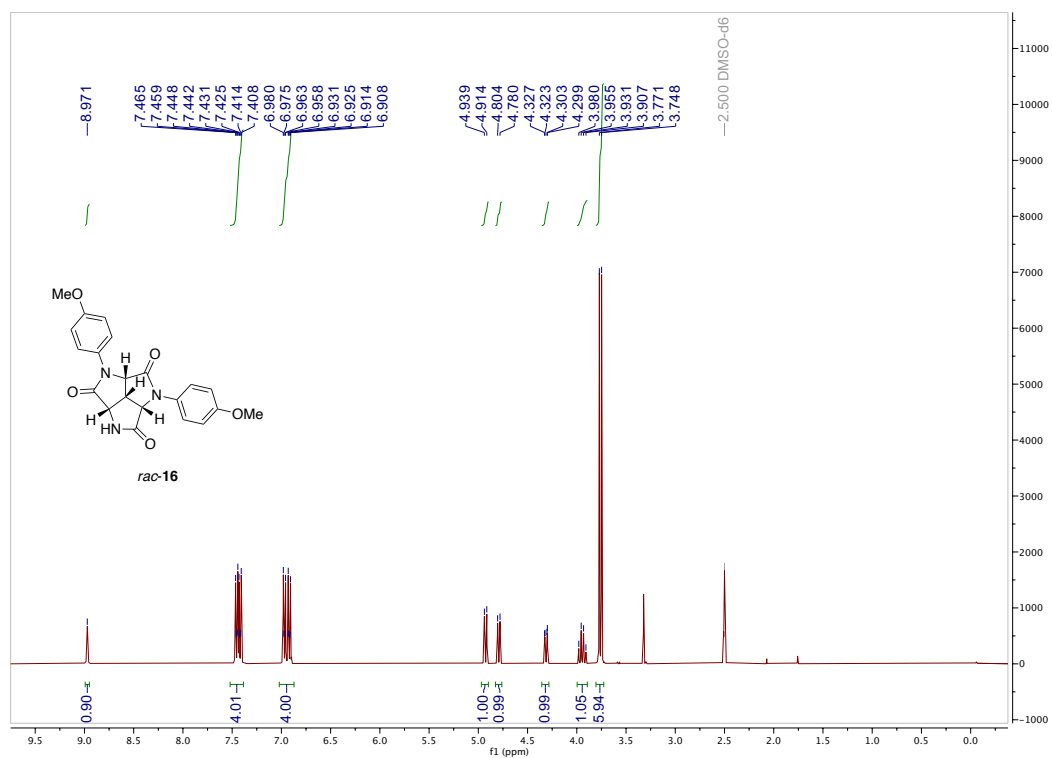

**Figure S14.** <sup>1</sup>H NMR spectrum (400 MHz, DMSO-*d*<sub>6</sub>) of *rac*-16.

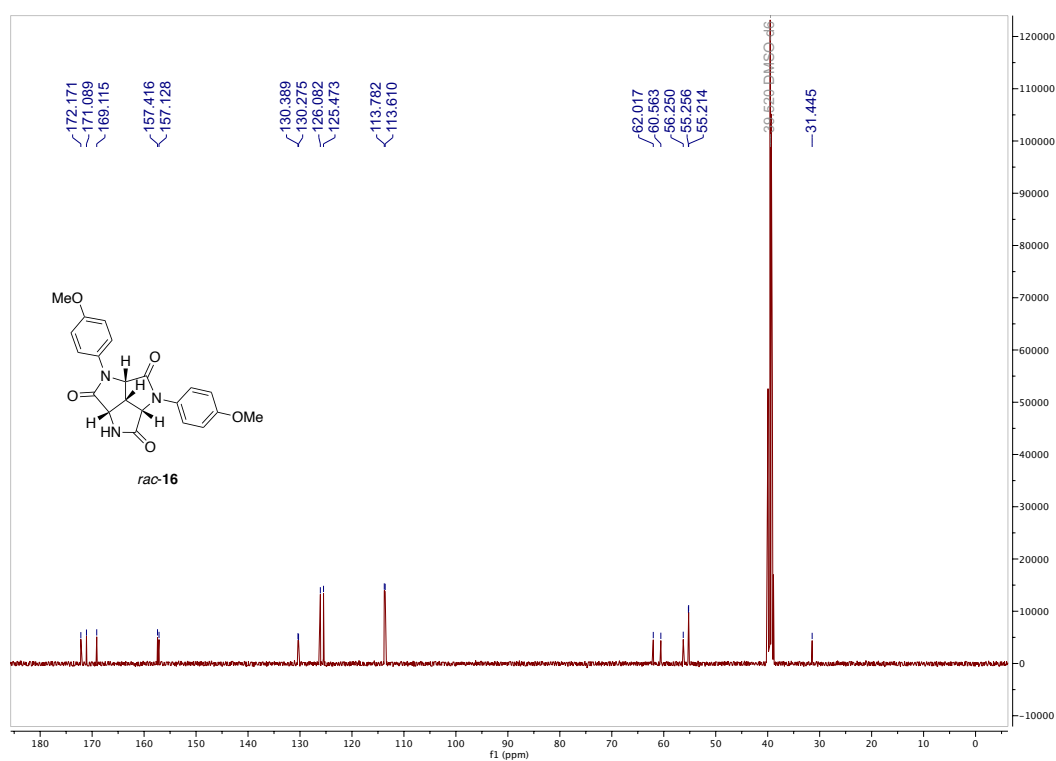

**Figure S15.** <sup>13</sup>C NMR spectrum (101 MHz, DMSO-*d*<sub>6</sub>) of *rac*-16.

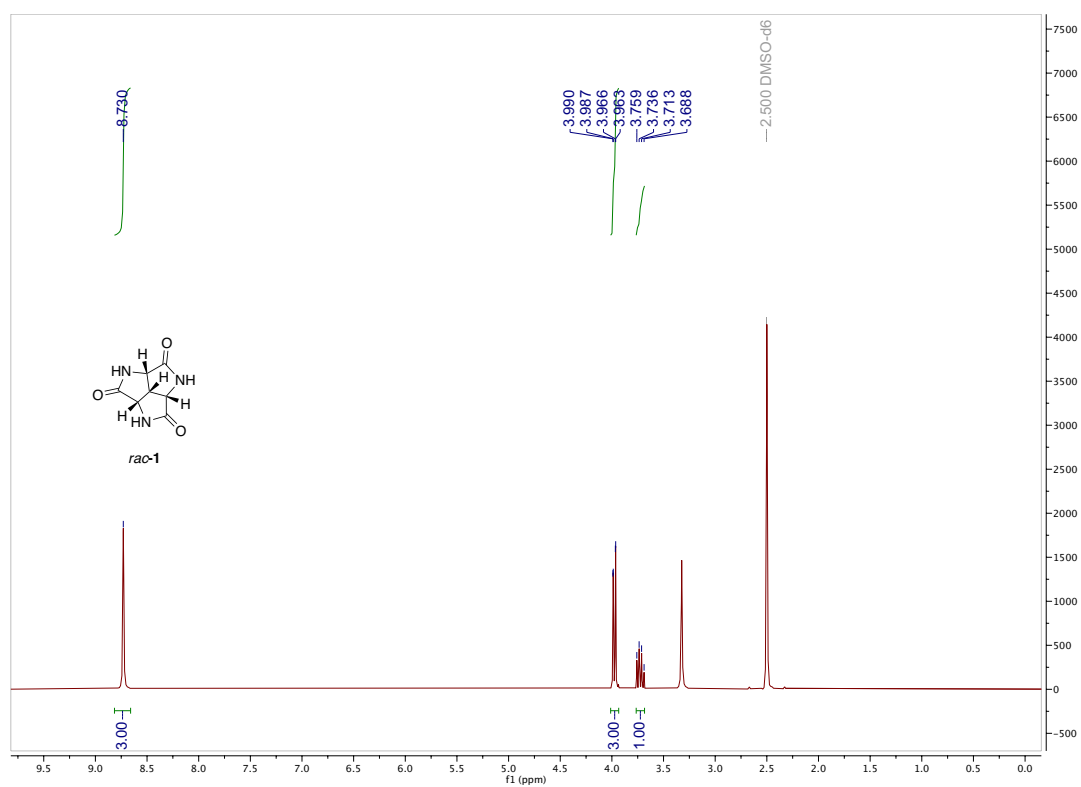

**Figure S16.**  $^1\text{H}$  NMR spectrum (400 MHz,  $\text{DMSO}-d_6$ ) of *rac-1*.

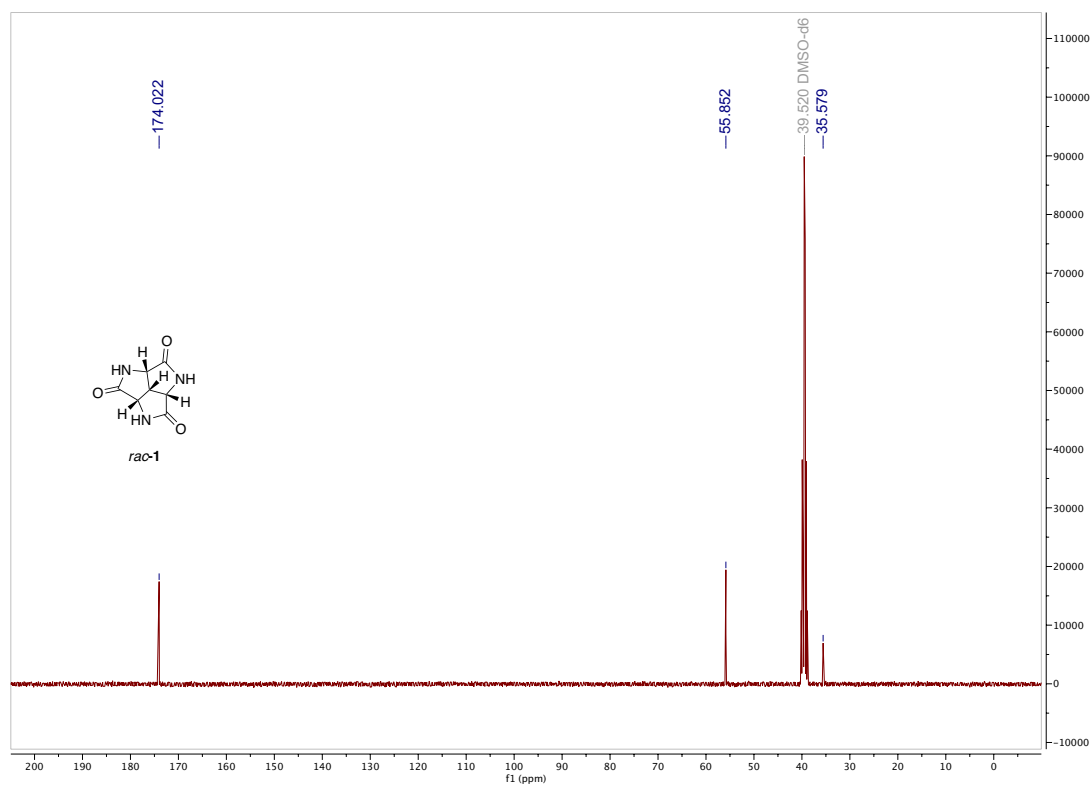

**Figure S17.**  $^{13}\text{C}$  NMR spectrum (101 MHz,  $\text{DMSO}-d_6$ ) of *rac-1*.

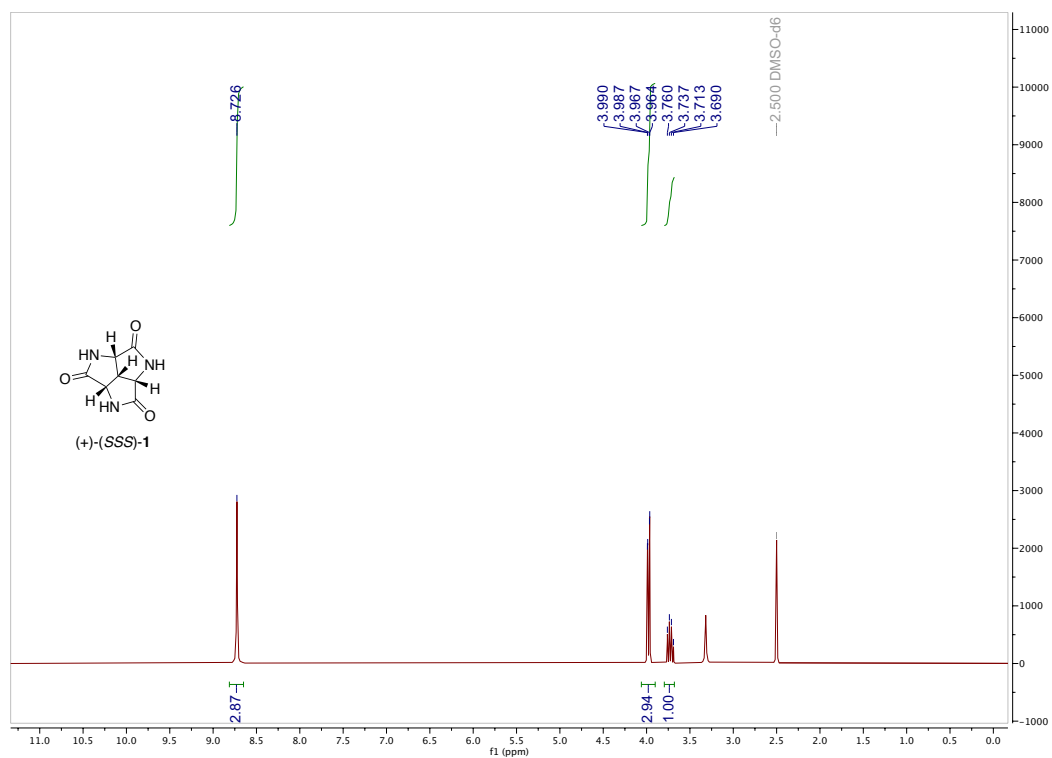

**Figure S18.**  $^1\text{H}$  NMR spectrum (400 MHz,  $\text{DMSO}-d_6$ ) of (+)-(SSS)-1.

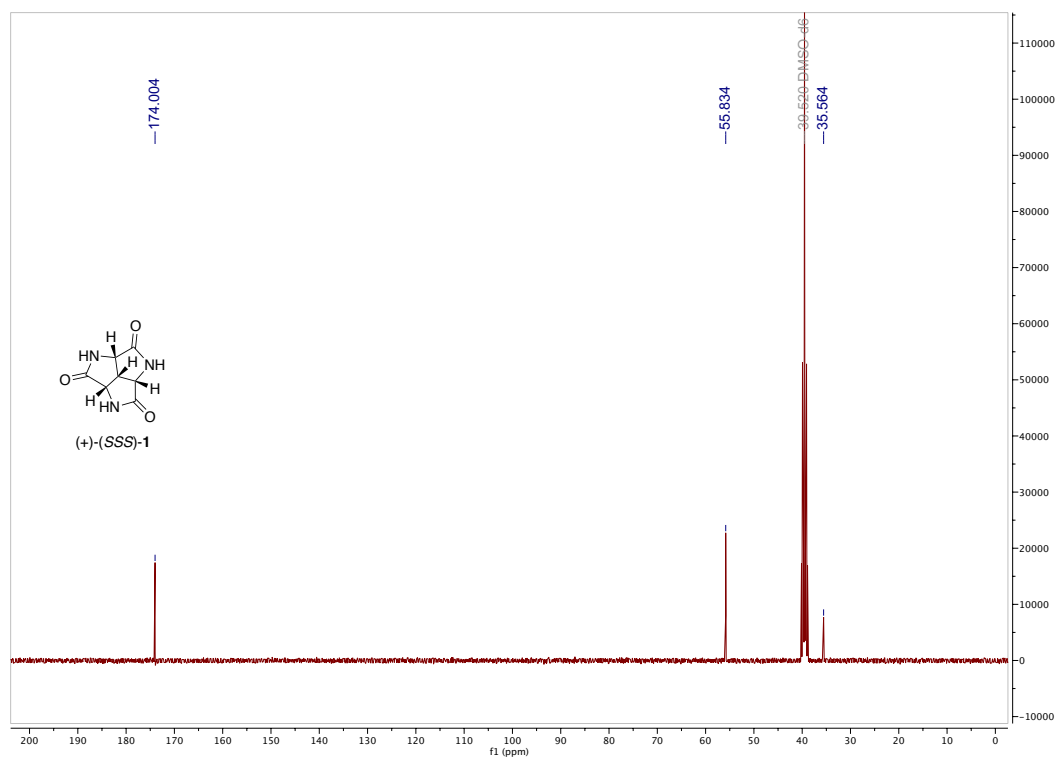

**Figure S19.**  $^{13}\text{C}$  NMR spectrum (101 MHz,  $\text{DMSO}-d_6$ ) of (+)-(SSS)-1.



## References

1. Ferreira de Freitas, R.; Harding, R. J.; Franzoni, I.; Ravichandran, M.; Mann, M. K.; Ouyang, H.; Lautens, M.; Santhakumar, V.; Arrowsmith, C. H.; Schapira, M., Identification and Structure–Activity Relationship of HDAC6 Zinc-Finger Ubiquitin Binding Domain Inhibitors. *J. Med. Chem.* **2018**, *61* (10), 4517-4527.
2. Furche, F.; Ahlrichs, R.; Hättig, C.; Klopper, W.; Sierka, M.; Weigend, F., Turbomole. *WIREs Comput Mol Sci* **2014**, *4* (2), 91-100.
3. Grimme, S.; Hansen, A.; Ehlert, S.; Mewes, J.-M., r2SCAN-3c: A “Swiss army knife” composite electronic-structure method. *J. Chem. Phys.* **2021**, *154* (6), 064103.
4. Klamt, A.; Schüürmann, G., COSMO: a new approach to dielectric screening in solvents with explicit expressions for the screening energy and its gradient. *J. Chem. Soc., Perkin Trans. 2* **1993**, (5), 799-805.
5. (a) Bauernschmitt, R.; Ahlrichs, R., Treatment of electronic excitations within the adiabatic approximation of time dependent density functional theory. *Chem. Phys. Lett.* **1996**, *256* (4), 454-464; (b) Grimme, S.; Furche, F.; Ahlrichs, R., An improved method for density functional calculations of the frequency-dependent optical rotation. *Chem. Phys. Lett.* **2002**, *361* (3), 321-328.
6. (a) Schäfer, A.; Huber, C.; Ahlrichs, R., Fully optimized contracted Gaussian basis sets of triple zeta valence quality for atoms Li to Kr. *J. Chem. Phys.* **1994**, *100* (8), 5829-5835; (b) Rappoport, D.; Furche, F., Property-optimized Gaussian basis sets for molecular response calculations. *J. Chem. Phys.* **2010**, *133* (13), 134105.
7. Lin, Y.-S.; Li, G.-D.; Mao, S.-P.; Chai, J.-D., Long-Range Corrected Hybrid Density Functionals with Improved Dispersion Corrections. *J. Chem. Theory Comput.* **2013**, *9* (1), 263-272.
8. CrysAlis PRO. Agilent Technologies 2011.
9. Farrugia, L. J., WinGX and ORTEP for Windows: an update. *J. Appl. Crystallogr.* **2012**, *45*, 849-854.
10. Palatinus, L. C.; Gervais, SUPERFLIP - a computer program for the solution of crystal structures by charge flipping in arbitrary dimensions. *J. Appl. Crystallogr.* **2007**, *40*, 786-790.
11. Sheldrick, G., Crystal structure refinement with SHELXL. *Acta Cryst.* **2015**, *C71*, 3-8.
